# Supplementary material for: Self-standing Fe3O4 decorated paper electrode as a binder-free trifunctional electrode for electrochemical ammonia synthesis and Zn–O2 batteries
Source: Royal Society of Chemistry journal article supplement (doi:10.1039/d2nr03297j), 2022-01-01
Supplement: d2nr03297j1.pdf [file d2nr03297j1.pdf]

## Supporting Information

### **Self-standing Fe<sub>3</sub>O<sub>4</sub> decorated paper electrode as binder-free trifunctional electrode for electrochemical ammonia synthesis and Zn-O<sub>2</sub> batteries**

Alankar Kafle<sup>a</sup>, Divyani Gupta<sup>a</sup>, Ankur Bordoloi<sup>b</sup> and Tharamani C. Nagaiah<sup>a\*</sup>

<sup>a</sup>Department of Chemistry, Indian Institute of Technology Ropar, Rupnagar, Punjab 140001, India.

<sup>b</sup>Council of Scientific and Industrial Research – Indian institute of Petroleum, Dehradun, India

\*Corresponding author. E-mail address: tharamani@iitrpr.ac.in

**Reagents and chemicals used.** Hydrochloric acid (HCl, 37%) was purchased from Merck. Nickel chloride ( $\text{NiCl}_2 \cdot 6\text{H}_2\text{O}$ , 97%), ammonium chloride ( $\text{NH}_4\text{Cl}$ , 99%), trisodium citrate ( $\text{Na}_3\text{C}_6\text{H}_5\text{O}_7$ ), salicylic acid ( $\text{C}_7\text{H}_6\text{O}_3$ , 99.5%), sodium nitroprusside ( $\text{C}_5\text{FeN}_6\text{Na}_2\text{O}$ , 99%), para-dimethylaminobenzaldehyde ( $p\text{-C}_9\text{H}_{11}\text{NO}$ , 99%), ferric nitrate ( $\text{Fe}(\text{NO}_3)_3 \cdot 9\text{H}_2\text{O}$ , 98%) and potassium hydroxide (KOH, 85%), sodium hydroxide (NaOH, 98%), hydrazine monohydrate ( $\text{N}_2\text{H}_4 \cdot \text{H}_2\text{O}$ , 99%), sodium hypochlorite solution (NaClO, 4-6%) and hydrogen peroxide solution ( $\text{H}_2\text{O}_2$ , 5%), zinc acetate ( $\text{Zn}(\text{Ac})_2$ , 98%), mercuric (II) iodide ( $\text{HgI}_2$ ) and sodium potassium tartrate ( $\text{C}_4\text{H}_4\text{O}_6\text{KNa} \cdot 4\text{H}_2\text{O}$ ), were bought from Loba chemie. Ethanol ( $\text{C}_2\text{H}_5\text{OH}$ , 99.9%), and acetone ( $\text{CH}_3\text{COCH}_3$ , 99%) were purchased from Rankem.  $^{15}\text{NH}_4\text{Cl}$  (99%) was purchased from Cambridge isotope laboratories. High purity  $^{14}\text{N}_2$  (99.999%),  $^{15}\text{N}_2$  (99%) and Ar gas (99.999%) and Ar gas (99.999%) cylinders were procured from Sigma. All solutions used in this study were prepared by using deionized water obtained from Millipore system (>15 M $\Omega$ ).

**Physical characterizations.** Initially, powder X-ray diffraction was carried out by using PANalytical X'PERT pro diffractometer with Cu-K $\alpha$  radiation ( $\lambda=0.1542$  nm, 40kV, 40mA) under the  $2\theta$  range of 5-80° at a scan speed of 2° per minute and a proportional counter detector for structural investigation of catalysts. Further, the morphology of the catalysts were studied using number of techniques including scanning electron microscopy (SEM, JEOL, JSM-6610LV), field emission-scanning electron microscopy (FE-SEM, Hitachi, Japan, SU8010) and transmission electron microscopy (HR-TEM, JEOL, Jem 2100 plus) where the high-resolution TEM (HR-TEM) images were obtained at 200 kV. The oxidation states of elements in the catalyst were studied with X-ray photoelectron spectroscopy XPS by using Thermo scientific NEXSA surface analysis with a

micro-focused (400  $\mu\text{m}$ , 72 W, 12000 V) monochromatic Al K $\alpha$  (1486.6 eV) a hemispherical analyser and 128 channel plate detectors under ultrahigh vacuum (UHV 8-10 mbar). The obtained spectra were calibrated with C 1s spectra. Quantification of various products formed during NRR were tested using an (SEC2000-DH) UV-Vis Spectrometer.

**Electrochemical characterizations.** All the electrochemical investigations were carried out in a single compartment electrochemical cell during ORR and OER. On the other hand, for NRR, the electrochemical characterizations were executed in a home made two compartment H-cell, separated by a Nafion N117 membrane under ambient conditions of temperature and pressure. Prior fitting the membrane into the H-cell, cleaning of membrane was done by initially boiling it in deionized water ( $>14\text{ M}\Omega$ ) for 30 min., and then in  $\text{H}_2\text{O}_2$  (5%) solution for another 30 min. at 80  $^\circ\text{C}$ , after which it was finally boiled in 0.05 M  $\text{H}_2\text{SO}_4$  for continuous 1 h. A typical three electrode electrochemical cell-setup comprising of a working electrode (WE), a home-made double junction Hg/HgO/1M NaOH reference electrode (RE) and Pt wire counter electrode (CE) was used for electrochemical measurements in 1 M KOH (for ORR/OER) and 0.1 M KOH (for NRR) electrolyte solution. Autolab 302N modular potentiostat/galvanostat was utilised to perform RDE experiments and further analysed by NOVA 1.11 software under the hydrodynamic conditions at different rotation rates by using a speed controlling unit (AFMSRC, Pine research instrument Inc., USA). All other investigations were done by means of Biologic VSP 300 Potentiostat including linear sweep voltammetry (LSV), chronoamperometry, electrochemical impedance spectroscopy (EIS) and cyclic voltammetry (CV).

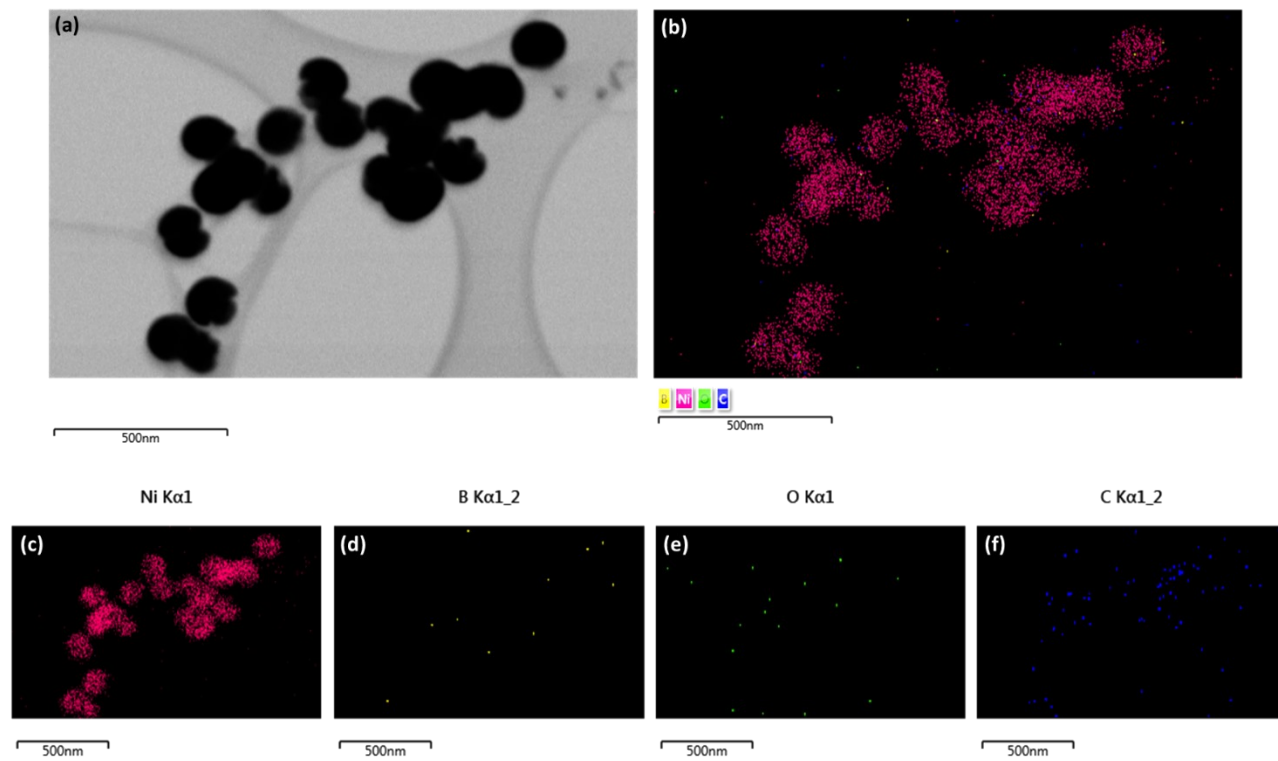

**Fig. S1** TEM elemental dot mapping images for (a) all elements and separately for (b) Ni, (c) B, (d) C and (e) O of NiB-CP electrode.

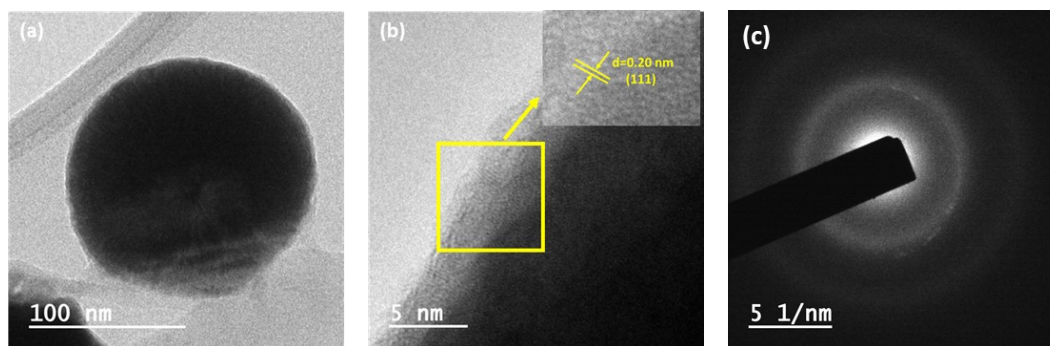

**Fig. S2** (a) TEM, (b) HR-TEM image and (c) SAED pattern of NiB-CP electrode.

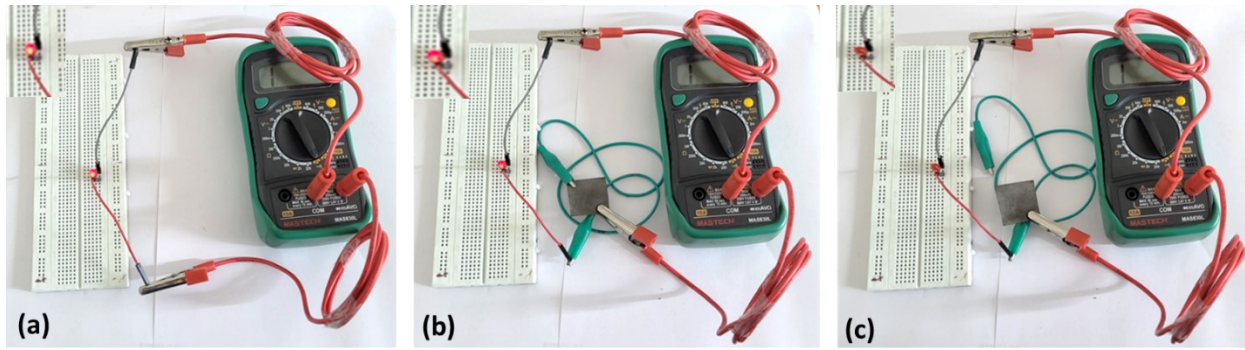

**Fig. S3** Photograph of lighting LED (a) directly by multimeter, (b) through NiB-CP and (c) photograph of light off LED after disconnection. (Inset: zoomed part of the LED bulb).

### Conductivity measurements by four probe method<sup>1</sup>

The electrical conductivity of the NiB-CP was measured by four probe method. The Ni-CP paper was placed below the four probes then a fixed amount of current was applied on it and the corresponding potential was recorded. The resistivity  $\rho_0$  is obtained as:

$$\rho_0 = \frac{V}{I} 2\pi s$$

Where,

$V$  = floating potential difference between the inner probes,

$I$  = current through the outer pair of probes and

$s$  = spacing between point probes

The resistivity for thin film is corrected as:

$$\rho = \frac{\rho_0}{G_7\left(\frac{w}{s}\right)}$$

$$G_7(w/s) = \frac{2s}{w} \ln 2$$

Where,  $s$  = spacing between probes = 0.2 cm and

$w$  = thickness of NiB-CP electrode = 0.027 cm

And finally, the conductivity was calculated from the reciprocal of the resistivity.

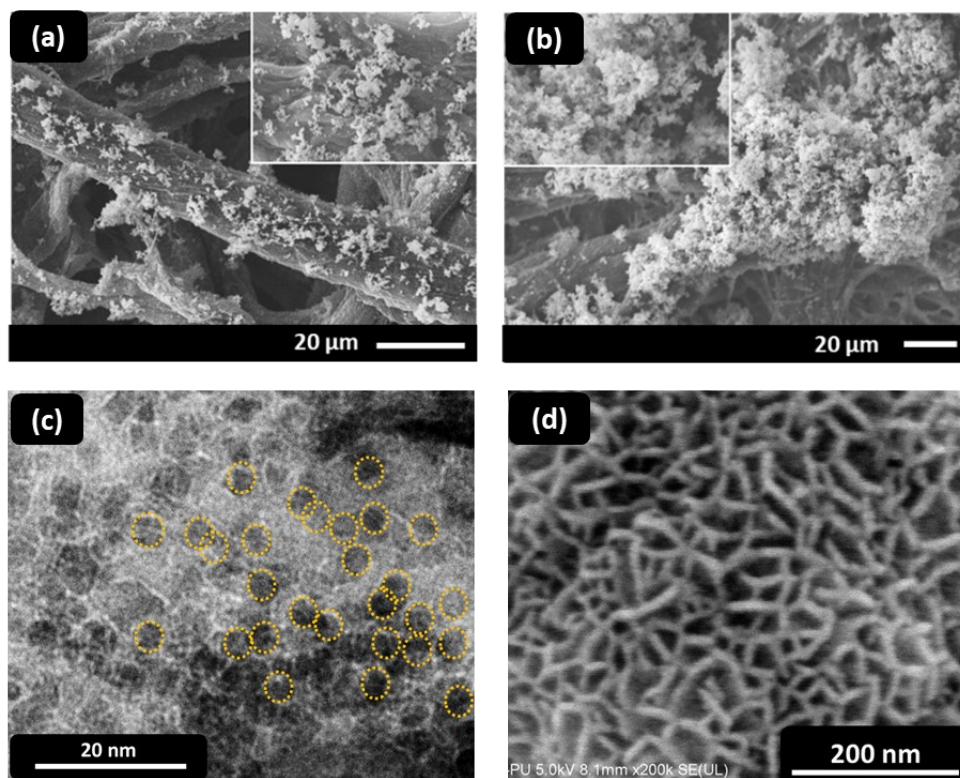

**Fig. S4** SEM images of (a)  $\text{Fe}_3\text{O}_4$ -60/NiB-CP and (b)  $\text{Fe}_3\text{O}_4$ -80/NiB-CP electrodes. (c) HR-TEM image, (d) FE-SEM of  $\text{Fe}_3\text{O}_4$ -70/NiB-CP showing porous framework in  $\text{Fe}_3\text{O}_4$  nanospheres.

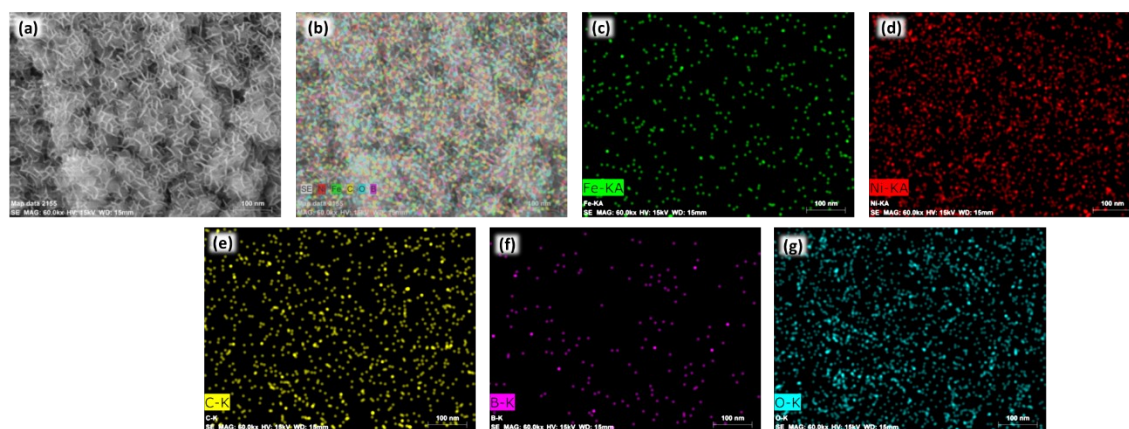

**Fig. S5** (a) Scanned area for elemental dot mapping images of (b) all elements and separately for (c) Ni, (d) Fe (e) B, (f) C and (g) O of  $\text{Fe}_3\text{O}_4$ -70/NiB-CP electrode.

**Table S1.** Elemental analysis of Fe<sub>3</sub>O<sub>4</sub>-70/NiB-CP electrode.

| S.No. | Elements | EDS Analysis (mass %) | MP-AES Analysis (mass %) |
|-------|----------|-----------------------|--------------------------|
| 1     | Nickel   | 46.5                  | 45.64                    |
| 2     | Iron     | 3.38                  | 5.27                     |
| 3     | Carbon   | 20.29                 | -                        |
| 4     | Oxygen   | 19.89                 | -                        |

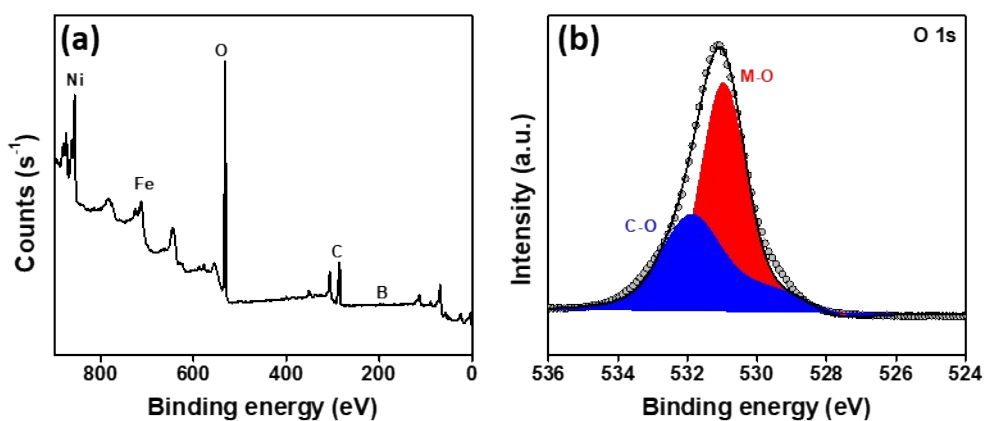

**Fig. S6** The XPS spectra of Fe<sub>3</sub>O<sub>4</sub>-70/NiB-CP (a) Full survey scan and (b) deconvoluted spectra of O1s.

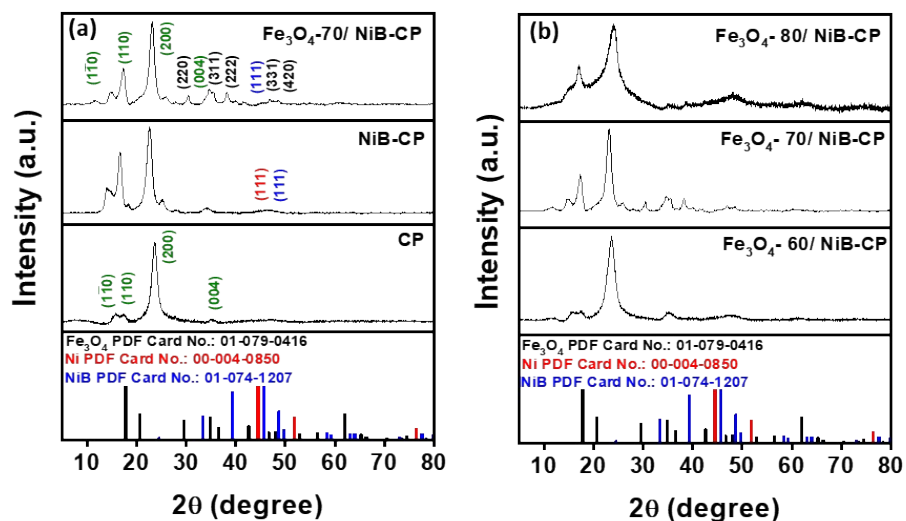

**Fig. S7A** The P-XRD pattern of (a) bare CP, NiB-CP, and Fe<sub>3</sub>O<sub>4</sub>-70/NiB-CP and (b) Fe<sub>3</sub>O<sub>4</sub>-60/NiB-CP, Fe<sub>3</sub>O<sub>4</sub>-70/NiB-CP and Fe<sub>3</sub>O<sub>4</sub>-80/NiB-CP electrodes.

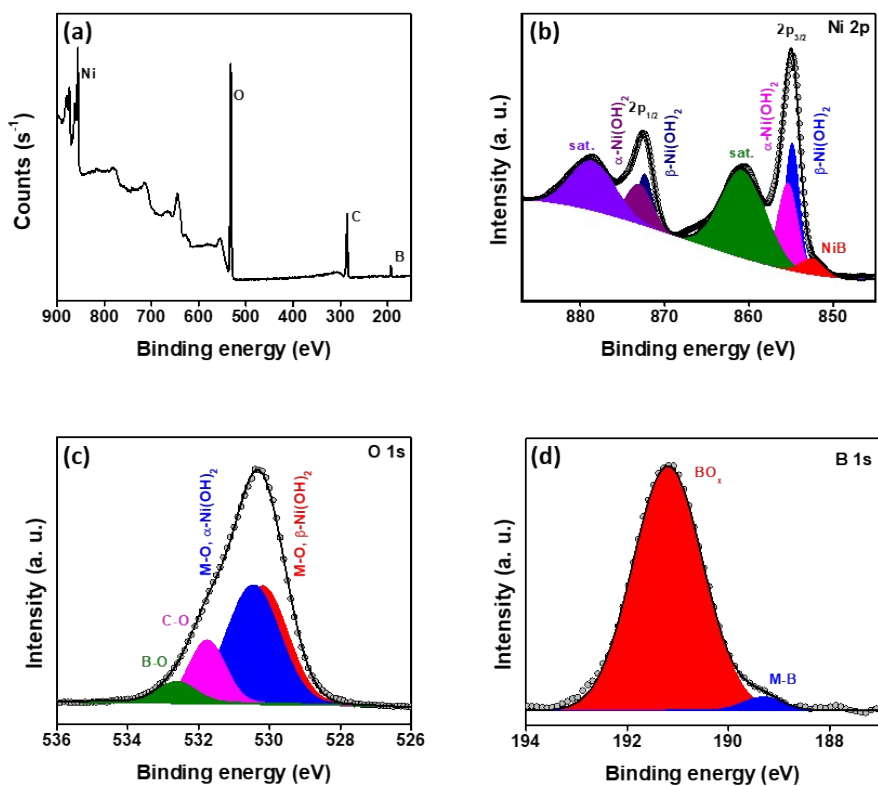

**Fig. S7B** The XPS spectra of NiB-CP (a) Full survey scan and deconvoluted spectra of (b) Ni 2p, (c) O 1s and (d) B 1s.



## Quantification of Ammonia<sup>2</sup>

**By Indophenol blue method:** The amount of ammonia formed during electrochemical reduction was quantified UV-Visible spectrophotometrically by Indophenol blue method. In detail, 2 mL of electrolyte was taken after the reduction and 2 mL of salicylic acid & sodium citrate (5% each) solution in 1M KOH followed by 1 mL of 0.05 M NaClO and 0.2 mL of 1% C<sub>5</sub>FeN<sub>6</sub>Na<sub>2</sub>O·2 H<sub>2</sub>O were added and left for 2 hrs for complete color development. finally, the UV-Vis absorption spectra were recorded at a wavelength of 655 nm. The concentration–absorbance calibration curve was generated with the help of standard NH<sub>4</sub>Cl solution with known NH<sub>4</sub><sup>+</sup> concentrations of 0.1, 0.2, 0.4, 0.8, 1.0 and 2.0 µg mL<sup>-1</sup> and from which the ammonia was determined. The rate of ammonia formation was determined according to

$$\text{Yield rate}(\mu\text{g cm}^{-2} \text{ h}^{-1}) = \frac{V \times C_{\text{NH}_3}}{t \times m_{\text{cat.}}}$$

Here, C<sub>NH<sub>3</sub></sub> is the measured NH<sub>3</sub> concentration, V the volume of electrolyte, t the time of the reduction reaction and m<sub>cat</sub> is the mass of the catalyst loaded onto the electrode.

Similarly, its Faradaic efficiency (F.E.) was calculated as

$$\text{F.E. (\%)} = \frac{3 \times F \times V \times C_{\text{NH}_3}}{17 \times Q}$$

Where F is the Faraday constant and Q is the total amount of charge passed through the electrodes during the electrolysis.

**By Nessler's reagent method:**<sup>3</sup> The amount of NH<sub>3</sub> quantified by Indophenol blue method was further validated by performing Nessler's test. The Nessler's reagent was prepared by mixing 2.5 g of mercuric iodide into 5 mL aq. solution of potassium iodide (2 g in 5 mL deionized water)

which was further diluted to 20 mL by with deionized water and finally 4 g of NaOH was added into it. The electrolyte solution (5 mL) was collected after e-NRR and 0.25 mL of sodium potassium tartrate ( $500 \text{ g L}^{-1}$ ) followed by 0.25 mL of Nessler's reagent was added into it and left for 10 minutes for color development. And finally, UV-Vis. absorption measurement was performed at  $\lambda=420 \text{ nm}$ . The calibration curve was developed by using standard  $\text{NH}_4\text{Cl}$  solution having concentrations of 0.1, 0.2, 0.4, 0.8, and  $1.0 \mu\text{g mL}^{-1}$  in the same way.

**Quantification of hydrazine By Watt-Chrisp method:**<sup>2</sup> The hydrazine formed during the electrolysis was quantified UV-visible spectrophotometrically by Watt and Chrisp method by applying coloring solution composed of p- $\text{C}_9\text{H}_{11}\text{NO}$  (0.4 g) in HCl (concentrated, 2 mL) and  $\text{C}_2\text{H}_5\text{OH}$  (20 mL). After electrolysis, 2 mL of electrolyte taken from cathodic chamber was mixed with 2ml of coloring solution and kept for 20 minutes in room temperature for color development. Finally, the  $\text{N}_2\text{H}_4$  was quantified UV-visible spectrophotometrically with the help of calibration curve generated by recording absorbance at 455 nm by taking standard hydrazine solution of concentrations of 0.1,0.2, 0.4, 0.8 and  $1.0 \mu\text{g mL}^{-1}$  in 0.1 M KOH.

**TOF calculations for the catalyst during e-NRR:**

$$\text{Turnover frequency (TOF)} = \frac{\text{Turnover number (TON)}}{\text{Time (h)}}$$

$$(\text{TON}) = \frac{\text{NH}_3 \text{ yield (mg)}}{\text{Catalyst loading (mg)}}$$

**Isotope labelling experiments:** In order to perform the isotope labelling experiment,  $^{15}\text{N}_2$  (Sigma-Aldrich 99 atom%  $^{15}\text{N}$ ) was taken as the feeding gas which was passed through

alkaline  $\text{KMnO}_4$  followed by dilute  $\text{H}_2\text{SO}_4$  solution in order to eliminate the N-containing impurities before purging to cell and a fixed amount of gas (20 mL gas in the interval of the 15 minutes) was supplied during the electrolysis at  $-0.1$  V vs. RHE for 1 h. The electrolyte (25) was taken out after electrolysis and acidified with 1M HCl solution and finally concentrated to 2 mL. Then, 0.9 ml of the concentrated solution was mixed with 0.1 ml of DMSO-  $d_6$  as an internal standard and performed  $^1\text{H}$  nuclear magnetic resonance measurements ( $^1\text{H}$  NMR) with water suppression.

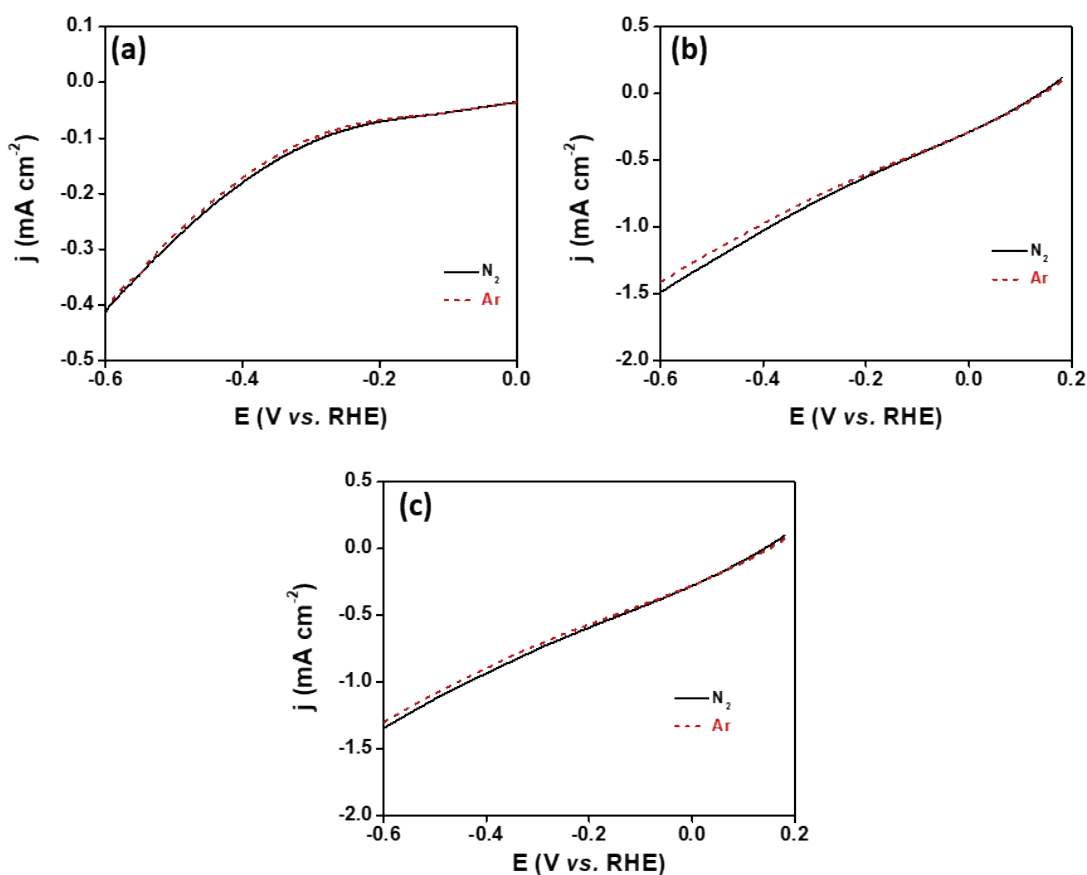

**Fig. S8** LSV curves of (a) NiB-CP (b)  $\text{Fe}_3\text{O}_4$ -60/NiB-CP and (c)  $\text{Fe}_3\text{O}_4$ -80/NiB-CP electrodes recorded in Ar and  $\text{N}_2$  saturated  $0.1$  M KOH.

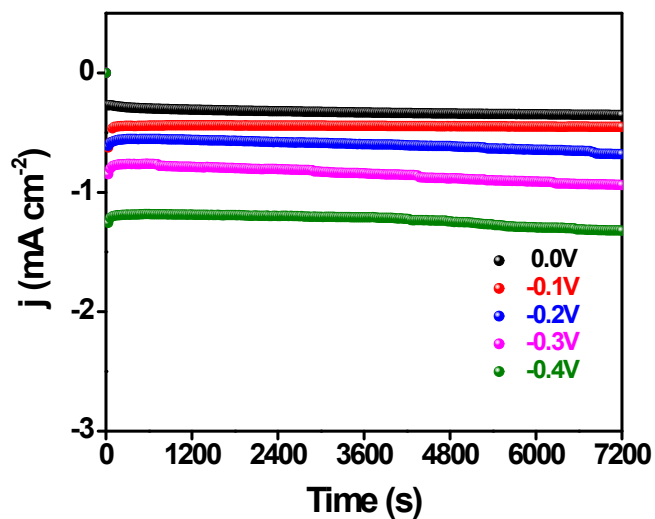

**Fig. S9** Chronoamperometric curves of Fe<sub>3</sub>O<sub>4</sub>-70/NiB-CP at different potentials.

**Table S2.** Comparison of onset potential and net current density of different composites extracted from Fig. 2a and Fig. S7.

| S. No. | Composite                                 | Onset potential (V vs. RHE) | Net current density ( $j_{Ar}-j_{N2}$ ) (mA cm <sup>-2</sup> )<br>@-0.1 V vs. RHE |
|--------|-------------------------------------------|-----------------------------|-----------------------------------------------------------------------------------|
| 1      | Fe <sub>3</sub> O <sub>4</sub> -60/NiB-CP | -0.09                       | 0.020                                                                             |
| 2      | Fe <sub>3</sub> O <sub>4</sub> -70/NiB-CP | -0.05                       | 0.024                                                                             |
| 3      | Fe <sub>3</sub> O <sub>4</sub> -80/NiB-CP | -0.11                       | 0.018                                                                             |
| 4      | NiB-CP                                    | -0.21                       | -                                                                                 |

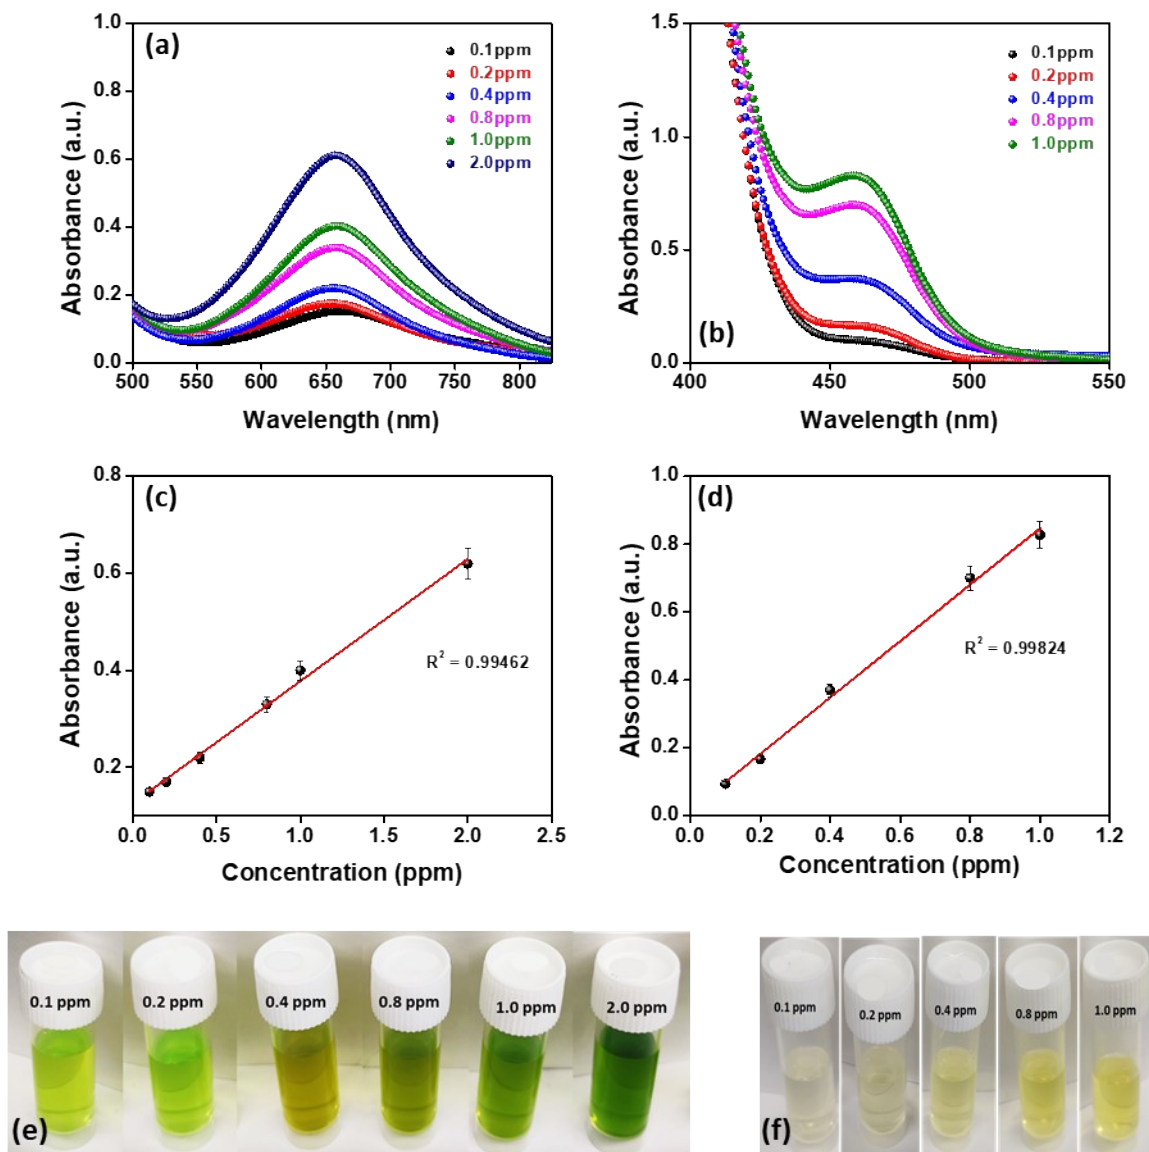

**Fig. S10A** UV-Vis spectrum of various known concentration standard (a)  $\text{NH}_3$  solutions quantified using Indophenol blue method, (b)  $\text{N}_2\text{H}_4$  solutions by Watt and Chrisp method and (c-d) & (e-f) their corresponding calibration curves and images captured during color development before UV-Vis. analysis.

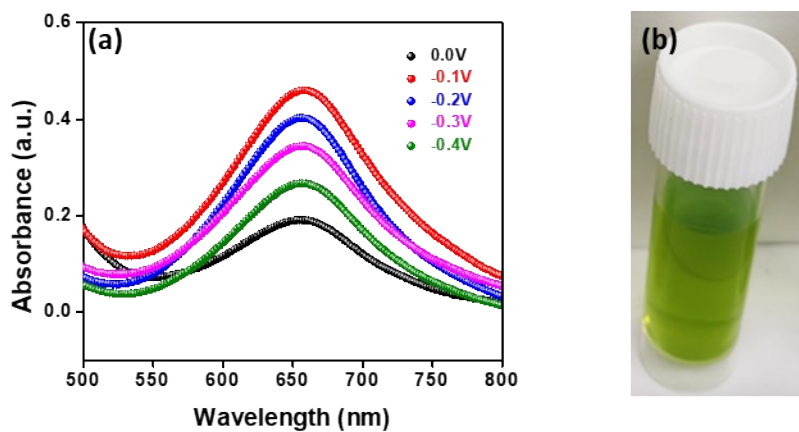

**Fig. S10B** (a) UV-vis spectrum of  $\text{Fe}_3\text{O}_4$ -70/NiB-CP obtained of the electrolyte sample after 2 h chronoamperometry at different potentials in  $\text{N}_2$  saturated 0.1 M KOH electrolyte. (b) Photograph captured upon color development in electrolyte solution after 2h electrolysis at -0.1 V.

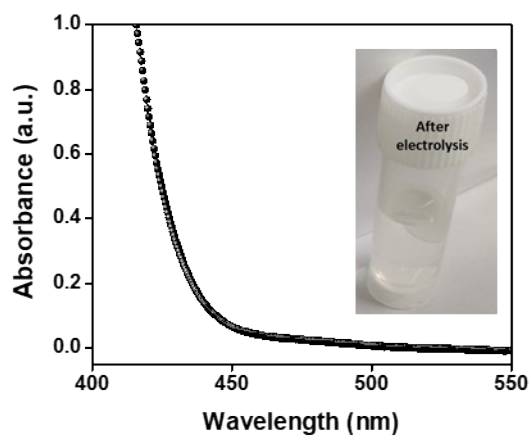

**Fig. S10C** UV-Vis spectra for  $\text{N}_2\text{H}_4$  solutions obtained by Watt and Chrisp method of the electrolyte sample after 2 h chronoamperometry at  $-0.1$  V vs. RHE (inset: Photograph captured upon color development in electrolyte solution after 2h electrolysis at  $-0.1$  V).

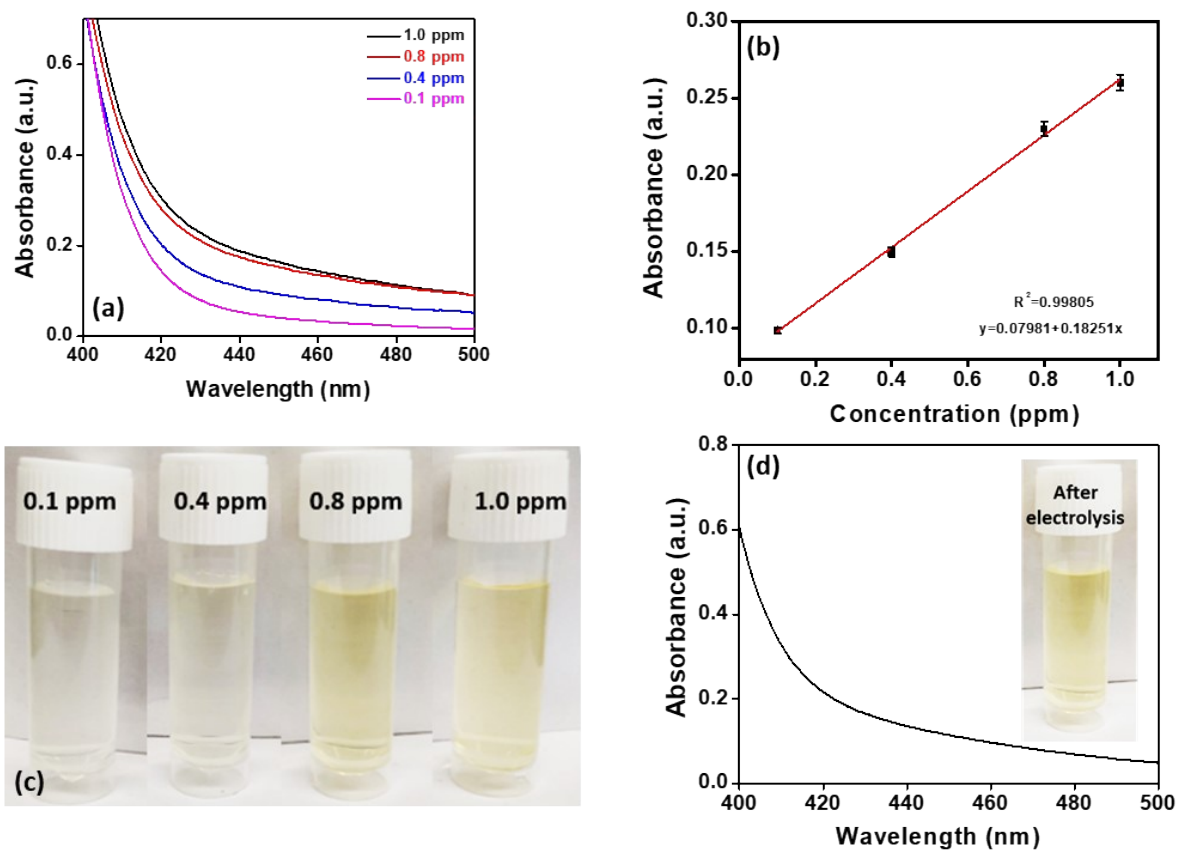

**Fig. S11** (a) Standard UV-Vis. curves for  $\text{NH}_4^+$  solutions (different concentrations) via Nessler's reagent test and (b) corresponding calibration curve extracted from (a). (c) Images showing color development of standard solutions with different  $\text{NH}_4^+$  concentrations after Nessler's test. (d) UV-Vis. absorbance curve for electrolyte solution collected after NRR by  $\text{Fe}_3\text{O}_4$ -70/ $\text{NiB}$ -CP in  $\text{N}_2$ -saturated 0.1 M KOH during Nessler's test.

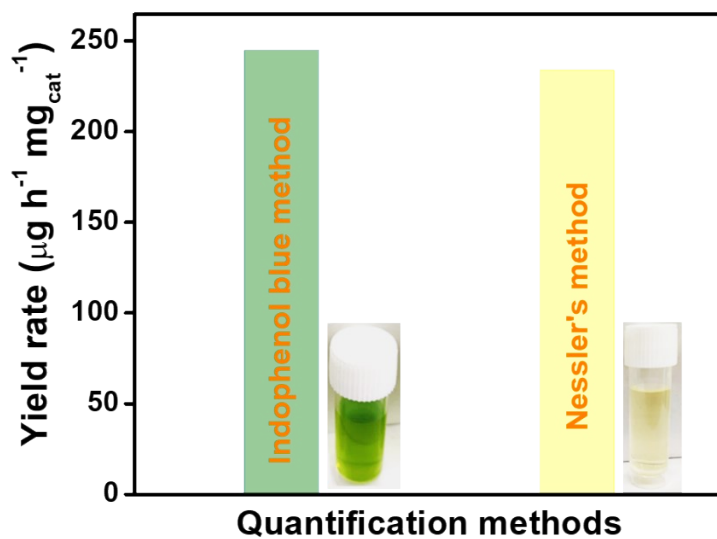

**Fig. S12** Bar graph comparison of NH<sub>3</sub> yield obtained after NRR by Fe<sub>3</sub>O<sub>4</sub>-70/NiB-CP at -0.1 V (vs. RHE) by different quantification methods.

**Table S3.** NH<sub>3</sub> yield obtained from different quantification techniques for Fe<sub>3</sub>O<sub>4</sub>-70/NiB-CP at -0.1 V.

| Method            | Yield rate (µg h <sup>-1</sup> mg <sub>cat</sub> <sup>-1</sup> ) |
|-------------------|------------------------------------------------------------------|
| Indophenol blue   | 245                                                              |
| Nessler's reagent | 234                                                              |



**Table S4.** Comparison of Faradic efficiency and yield rate during NRR of flexible electrodes with other reported literature

| S.No. | Composite                          | Substrate       | F.E. at V vs. RHE          | Yield                                                                  | Electrolyte                                                     | Ref.      |
|-------|------------------------------------|-----------------|----------------------------|------------------------------------------------------------------------|-----------------------------------------------------------------|-----------|
| 1     | N-free carbon cloth                | Carbon cloth    | 6.92% at -0.3 V            | $2.59 \times 10^{-10} \text{ mol cm}^{-2} \text{ s}^{-1}$              | 0.1 M $\text{Na}_2\text{SO}_4$ + 0.02 M $\text{H}_2\text{SO}_4$ | 4         |
| 2     | MoN/CFC                            | Carbon cloth    | 12.84% at -0.45 V          | $107.3 \mu\text{g h}^{-1} \text{ cm}^{-2}$                             | 0.1 M KOH                                                       | 5         |
| 3     | S/N co-doped carbon cloth (CC)     | Carbon cloth    | 8.11% at -0.3 V vs. RHE)   | $9.87 \times 10^{-10} \text{ mol s}^{-1} \text{ cm}^{-2}$              | 0.05 M $\text{H}_2\text{SO}_4$                                  | 6         |
| 4     | p- $\text{Fe}_2\text{O}_3$ /CC     | Carbon cloth    | 7.69% at -0.4 V            | $6.78 \mu\text{g h}^{-1} \text{ cm}^{-2}$                              | 0.1 M $\text{Na}_2\text{SO}_4$                                  | 7         |
| 5     | BiNPs@NF                           | Nickel foam     | 6.3% at -0.5V              | $9.3 \times 10^{-11} \text{ mol s}^{-1} \text{ cm}^{-2}$               | 0.5 M $\text{K}_2\text{SO}_4$                                   | 8         |
| 6     | $\text{SnS}_2$ @Ni                 | Nickel foam     | 10.8% at -0.5 V            | $9.17 \times 10^{-10} \text{ mol s}^{-1} \text{ cm}^{-2}$              | 0.1 M $\text{Na}_2\text{SO}_4$                                  | 9         |
| 7     | Fe-MoS <sub>2</sub> /CC            | Carbon cloth    | 10.8% at -0.1 V            | $12.5 \mu\text{g h}^{-1} \text{ cm}^{-2}$                              | 0.1 M KOH                                                       | 10        |
| 8     | VN/CC                              | Carbon cloth    | 3.58%) at -0.3 V           | $2.48 \times 10^{-10} \text{ mol}^{-1} \text{ s}^{-1} \text{ cm}^{-2}$ | 0.1 M HCl                                                       | 11        |
| 9     | MoS <sub>2</sub> -x                | Carbon cloth    | 10% at 0.3 V overpotential | 0.63 mmol/h/g                                                          | 0.01 M $\text{H}_2\text{SO}_4$                                  | 12        |
| 10    | $\text{Fe}_3\text{O}_4$ -70/NiB-CP | Cellulose paper | 4.32% at -0.1 V            | $245 \mu\text{g h}^{-1} \text{ mg}_{\text{cat}}^{-1}$                  | 0.1 M KOH                                                       | This work |

BiNPs@NF: bismuth nanoparticle @ nickel foam

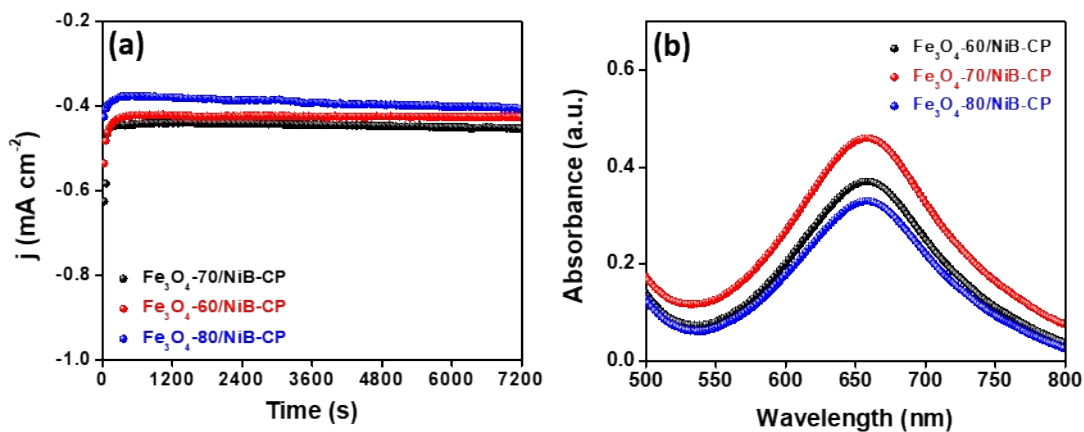

**Fig. S13** (a) Chronoamperometric curves of Fe<sub>3</sub>O<sub>4</sub>-60/NiB-CP, Fe<sub>3</sub>O<sub>4</sub>-70/NiB-CP and Fe<sub>3</sub>O<sub>4</sub>-80/NiB-CP at -0.1V vs. RHE and (b) corresponding UV-vis spectrum in N<sub>2</sub> saturated 0.1 M KOH electrolyte.

**Table S5.** Comparison of faradic efficiency and yield rate during NRR of different electrodes.

| S.No. | Composite                                 | F.E. (%) | Yield ( $\mu\text{g h}^{-1} \text{mg}^{-1}$ ) |
|-------|-------------------------------------------|----------|-----------------------------------------------|
| 1     | Fe <sub>3</sub> O <sub>4</sub> -60/NiB-CP | 2.56     | 144                                           |
| 2     | Fe <sub>3</sub> O <sub>4</sub> -70/NiB-CP | 4.32     | 245                                           |
| 3     | Fe <sub>3</sub> O <sub>4</sub> -80/NiB-CP | 2.24     | 111                                           |

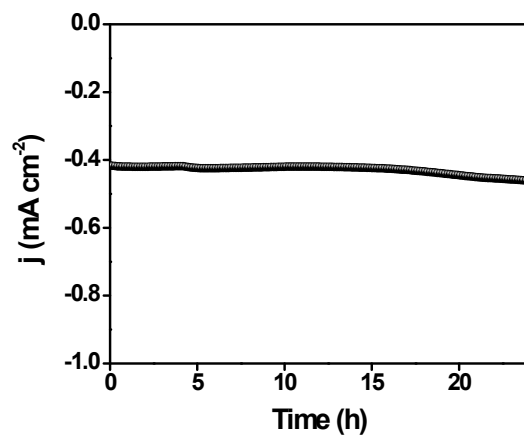

**Fig. S14A** Chronoamperometric curve of Fe<sub>3</sub>O<sub>4</sub>-70/NiB-CP in nitrogen saturated 0.1M KOH.

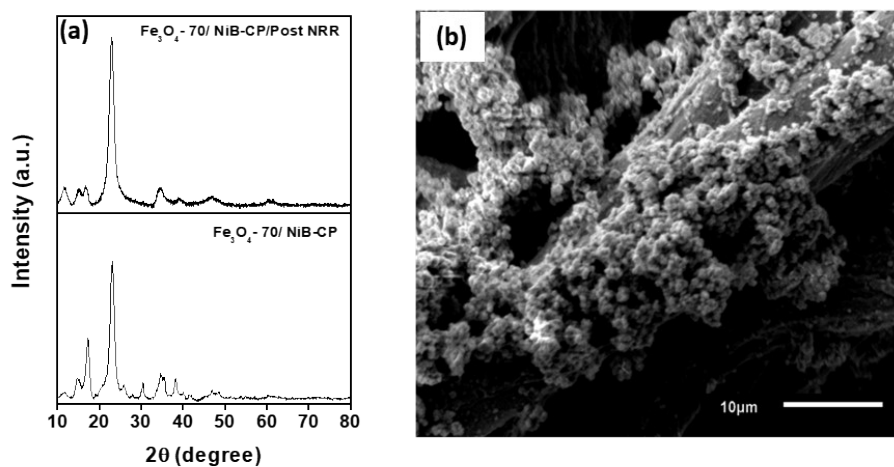

**Fig. S14B** (a) The diffraction pattern of Fe<sub>3</sub>O<sub>4</sub>-70/NiB-CP electrode before and after stability study during NRR. (b) SEM image of Fe<sub>3</sub>O<sub>4</sub>-70/NiB-CP electrode after stability study duri NRR.

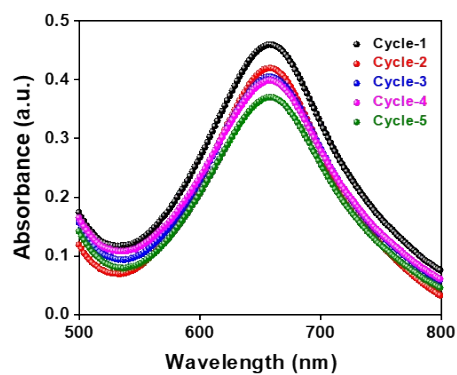

**Fig. S15** UV-vis spectrum of Fe<sub>3</sub>O<sub>4</sub>-70/NiB-CP for five different cycles in N<sub>2</sub> saturated 0.1 M KOH electrolyte.

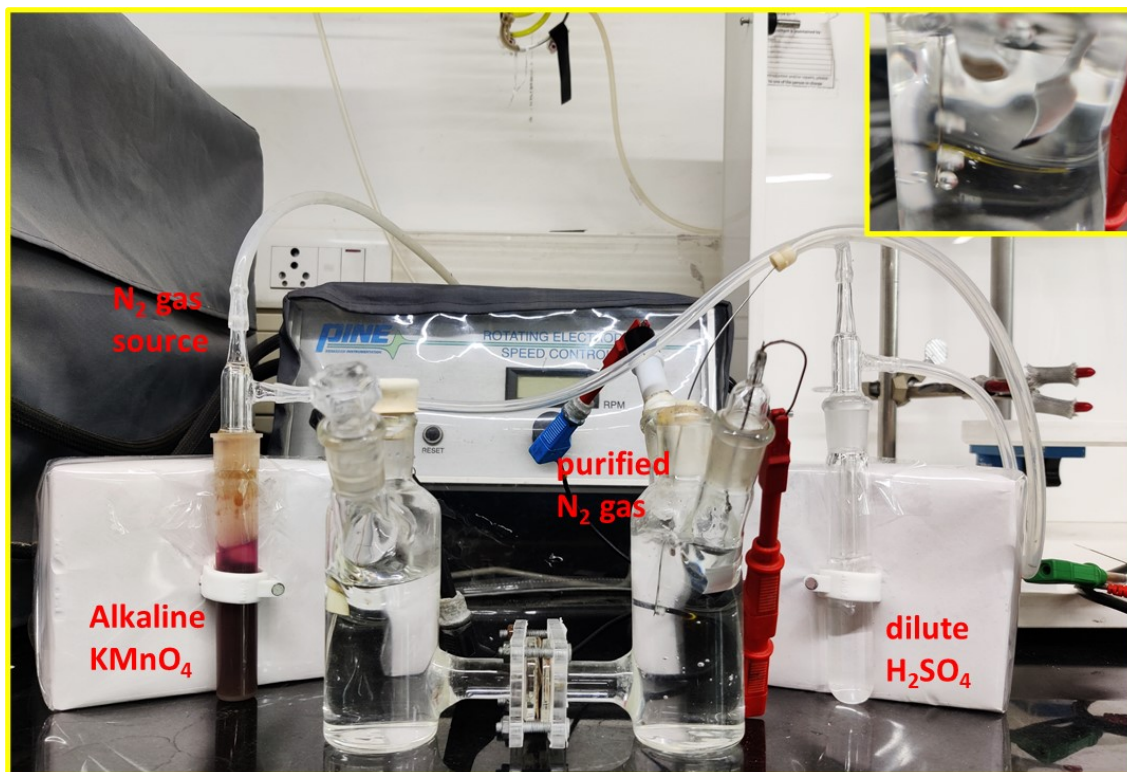

**Fig. S16** Image of H-cell setup prior to NRR measurements for purification of gas-streams passing through  $\text{KMnO}_4$  and acid trap (inset: zoomed part of cathodic compartment showing paper electrode).

### **Nitrate ( $\text{NO}_3^-$ ) and nitrite ( $\text{NO}_2^-$ ) determination<sup>13</sup>:**

In order to determine the trace amount of  $\text{NO}_3^-$  present in the electrolyte (i.e. 0.1 M KOH), UV-Vis. spectrophotometry was applied by considering the  $\lambda_{\text{max}}$  at 220 nm whereas the quantification of nitrites was carried out by through formation of a reddish purple azo dye produced at pH 2 - 2.5 by coupling diazotized sulfanilamide with N - (1-naphthyl) - ethylenediamine dihydrogen chloride (NEDA). The photometric measurement of the colored dye is done at 540nm.

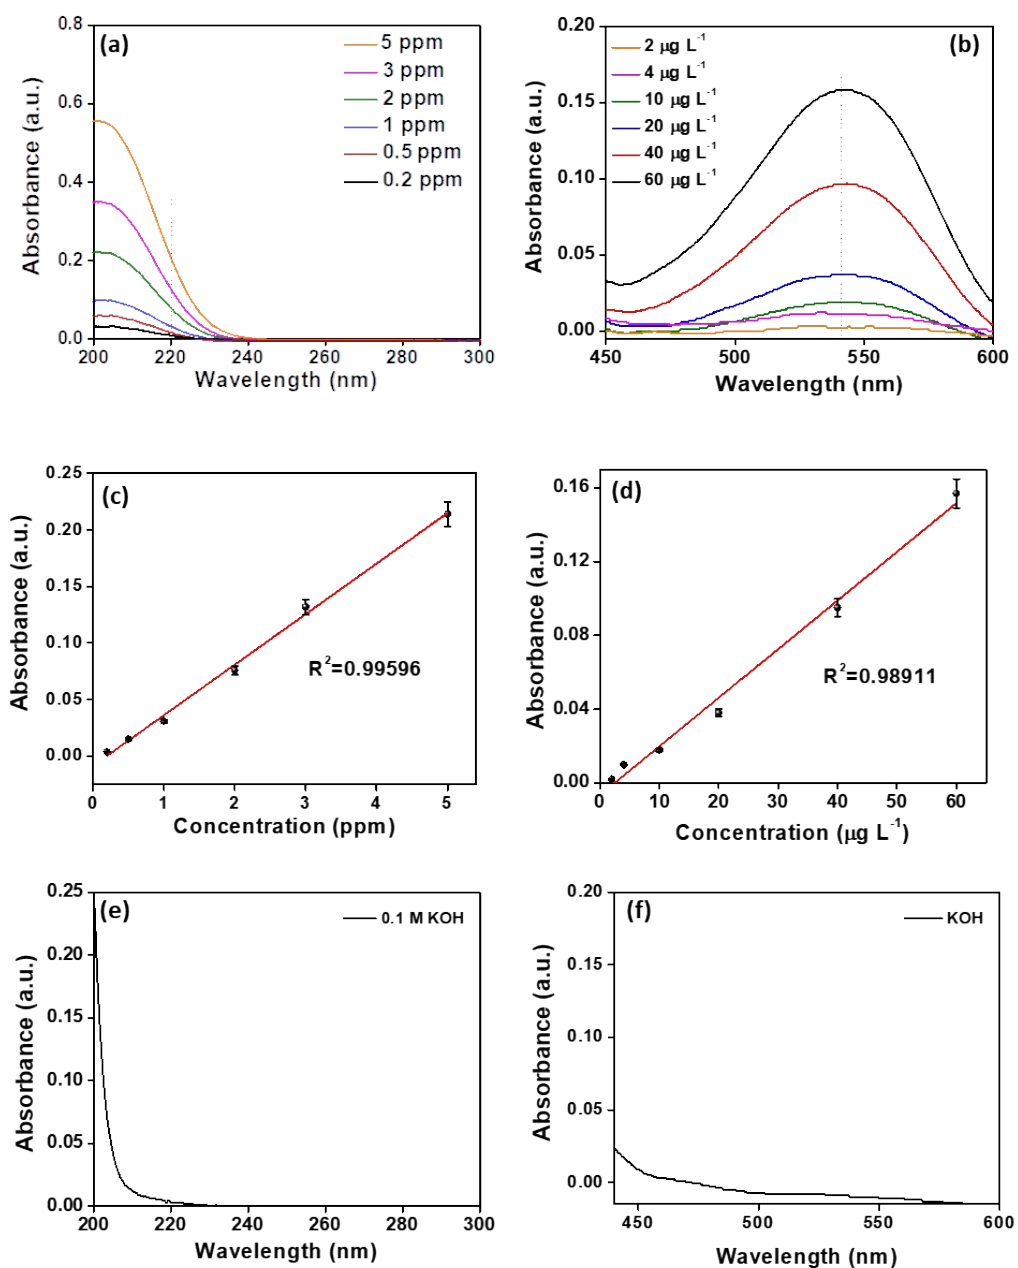

**Fig. S17** UV-Vis. absorbance curves for standard (a)  $\text{NO}_3^-$  and (b)  $\text{NO}_2^-$  solutions and (c)-(d) corresponding calibration curves. Quantification of (e)  $\text{NO}_3^-$  and (f)  $\text{NO}_2^-$  in 0.1 M KOH electrolyte solution.

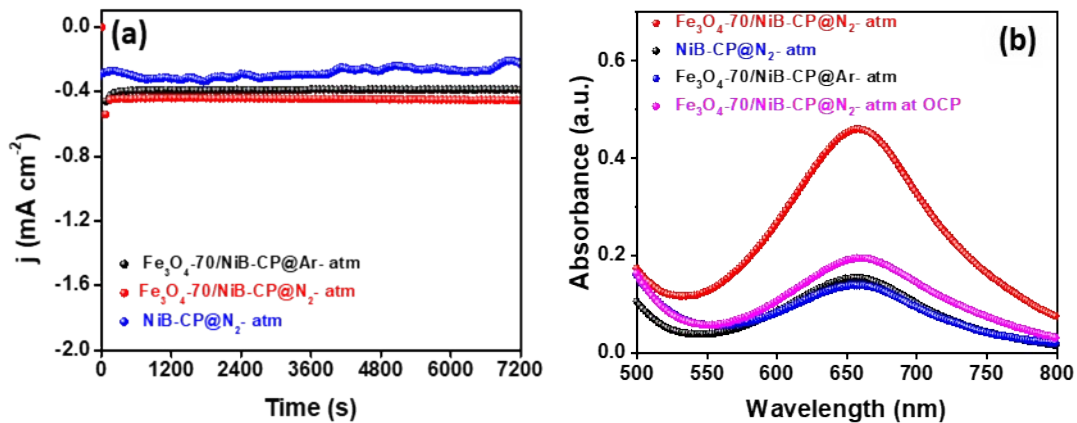

**Fig. S18** (a) Chronoamperometric curves of Fe<sub>3</sub>O<sub>4</sub>-70/NiB-CP in N<sub>2</sub>/Ar saturated electrolyte and NiB-CP in N<sub>2</sub> saturated 0.1 M KOH at -0.1 V vs. RHE and (b) corresponding UV-vis spectrum including of Fe<sub>3</sub>O<sub>4</sub>-70/NiB-CP at OCP in N<sub>2</sub> saturated 0.1 M KOH electrolyte.

**Table S6.** Comparison of overpotential and tafel slope for different composites towards OER.

| S.No. | Composites                                | Overpotential@10 mA cm <sup>-2</sup> (mV) | Tafel slope (mV dec <sup>-1</sup> ) |
|-------|-------------------------------------------|-------------------------------------------|-------------------------------------|
| 1     | Fe <sub>3</sub> O <sub>4</sub> -60/NiB-CP | 180                                       | 131                                 |
| 2     | Fe <sub>3</sub> O <sub>4</sub> -70/NiB-CP | 210                                       | 79                                  |
| 3     | Fe <sub>3</sub> O <sub>4</sub> -80/NiB-CP | 230                                       | 162                                 |
| 4     | RuO <sub>2</sub>                          | 290                                       | 60                                  |

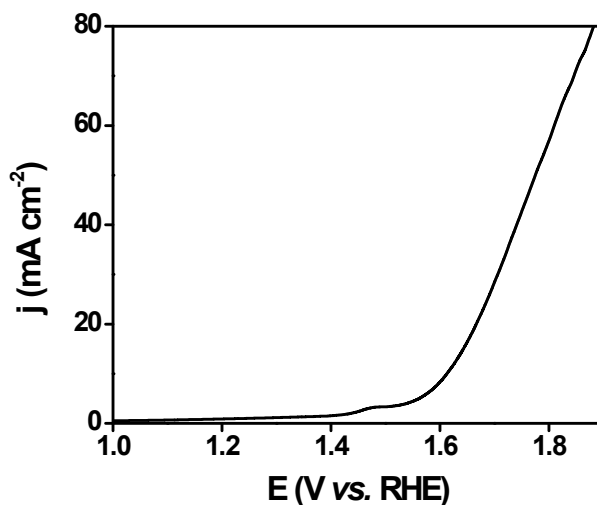

**Fig. S19** Linear sweep voltammogram (*iR* corrected) for Fe<sub>3</sub>O<sub>4</sub>-70/Ni-foam.

**Electrochemical surface area (ECSA):**

The actual number of exposed sites of the catalyst during the electrochemical reaction was investigated by determining the electrochemically active surface area of different composites by calculating the double-layer pseudo-capacitance ( $C_{dl}$ ). The cyclic voltammetry was recorded in the non-faradic potential region 1.13 V and 1.28 V vs. RHE with various scan rates (10 to 320 mV s<sup>-1</sup>). The slope obtained from the graph averaged current density versus the scan rate the double-layer pseudo capacitance was determined. Thus, the ECSA was obtained by dividing  $C_{dl}$  by the specific capacitance of the flat standard surface (20-60  $\mu\text{F cm}^{-2}$ ), which is considered here 40  $\mu\text{F cm}^{-2}$ .

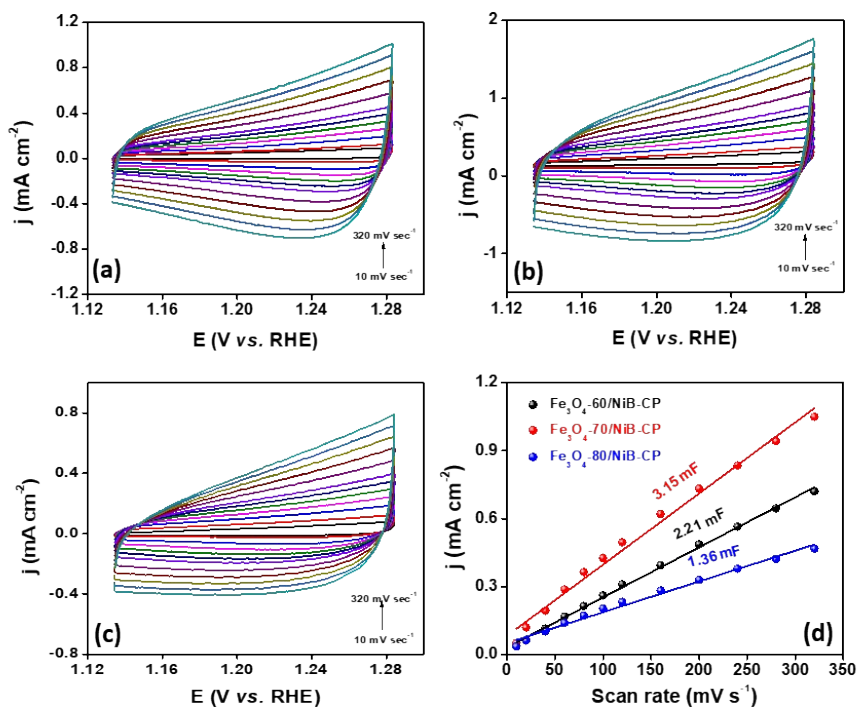

**Fig. S20** Cyclic voltammograms for (a)  $\text{Fe}_3\text{O}_4$ -60/NiB-CP, (b)  $\text{Fe}_3\text{O}_4$ -70/NiB-CP (c)  $\text{Fe}_3\text{O}_4$ -80/NiB-CP electrodes in non-faradic potential region at various scan rates and (d) corresponding average current density vs. scan rate plot for ECSA determination.

**Table S7 A.** Electrochemical surface area of different electrodes.

| S. No. | Composite                          | $C_{dl}$ (mF)@ 1.24 V<br>vs. RHE | ECSA ( $\text{cm}^2$ ) |
|--------|------------------------------------|----------------------------------|------------------------|
| 1      | $\text{Fe}_3\text{O}_4$ -60/NiB-CP | 2.21                             | 55.25                  |
| 2      | $\text{Fe}_3\text{O}_4$ -70/NiB-CP | 3.15                             | 78.75                  |
| 3      | $\text{Fe}_3\text{O}_4$ -80/NiB-CP | 1.36                             | 34                     |



### Electrochemical impedance measurements:

The electrochemical impedance spectroscopy study was performed by applying 1.43 V vs. RHE, DC potential over an AC perturbation of 10 mV with logarithmic frequency step over a single sine wave from 500 Hz to 10 mHz. The resulting Nyquist plot exhibited a semicircular behavior towards high frequency and a stout tail towards low frequency. The solution resistance ( $R_s$ ) was obtained from the semicircle intersection at the real high-frequency axis, and the polarization resistance ( $R_p$ ) at the low frequency near the electrode-electrolyte interface. The charge transfer resistance ( $R_{ct}$ ) was calculated from the difference in  $R_p$  and  $R_s$ .

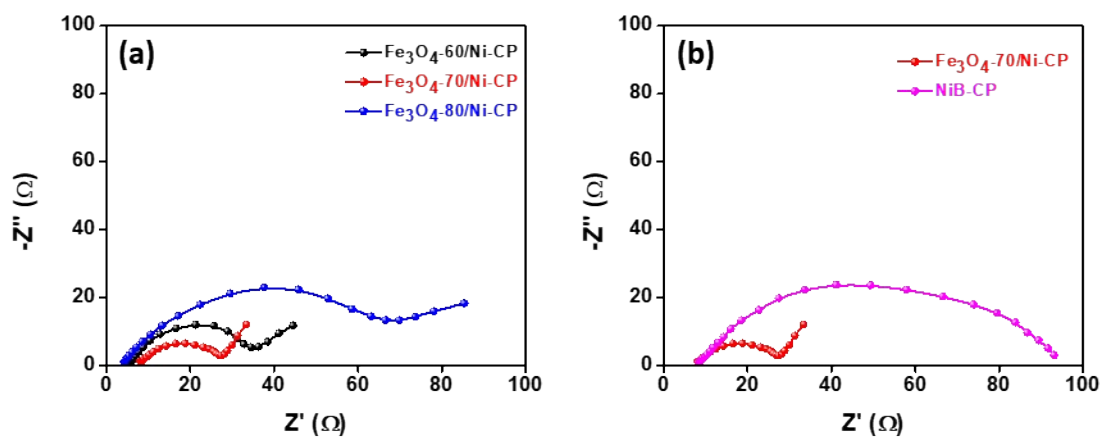

**Fig. S21** Nyquist plot for (a)  $\text{Fe}_3\text{O}_4$ -T/NiB-CP electrodes and (b) NiB-CP and  $\text{Fe}_3\text{O}_4$ -70/NiB-CP electrodes.

**Table S7 B.** Electrochemical Impedance analysis for various electrodes extracted from Fig. S21.

| S.No. | Composites                                | $R_s$ ( $\Omega$ ) | $R_p$ ( $\Omega$ ) | $R_{ct}$ ( $\Omega$ ) |
|-------|-------------------------------------------|--------------------|--------------------|-----------------------|
| 1     | Fe <sub>3</sub> O <sub>4</sub> -60/NiB-CP | 6                  | 34                 | 28                    |
| 2     | Fe <sub>3</sub> O <sub>4</sub> -70/NiB-CP | 7                  | 27                 | 20                    |
| 3     | Fe <sub>3</sub> O <sub>4</sub> -80/NiB-CP | 5                  | 67                 | 62                    |
| 4     | NiB-CP                                    | 8                  | 93                 | 85                    |

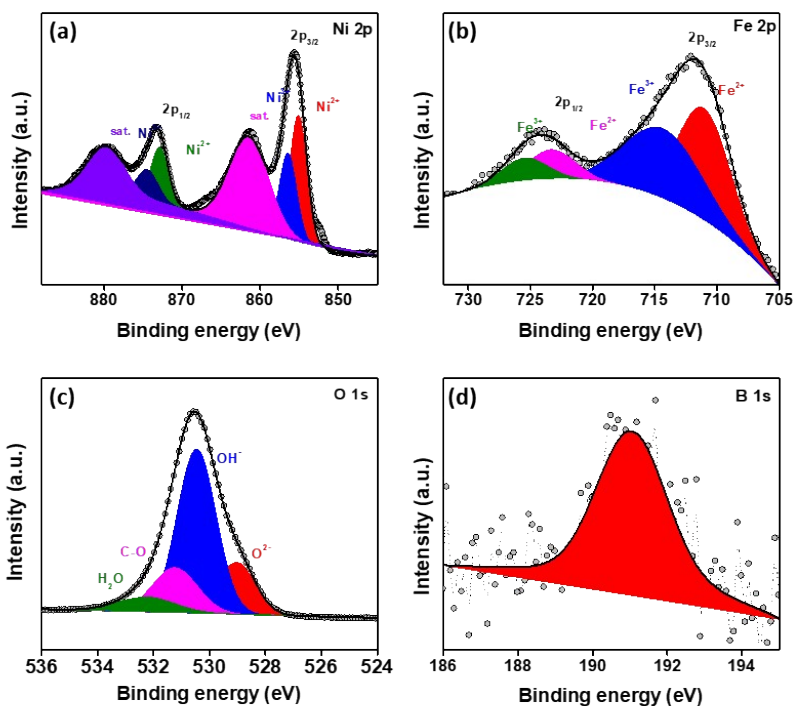

**Fig. S22A** XPS deconvoluted (a) Ni 2p, (b) Fe 2p, (c) O 1s and (d) B 1s spectrum obtained after OER stability tests.

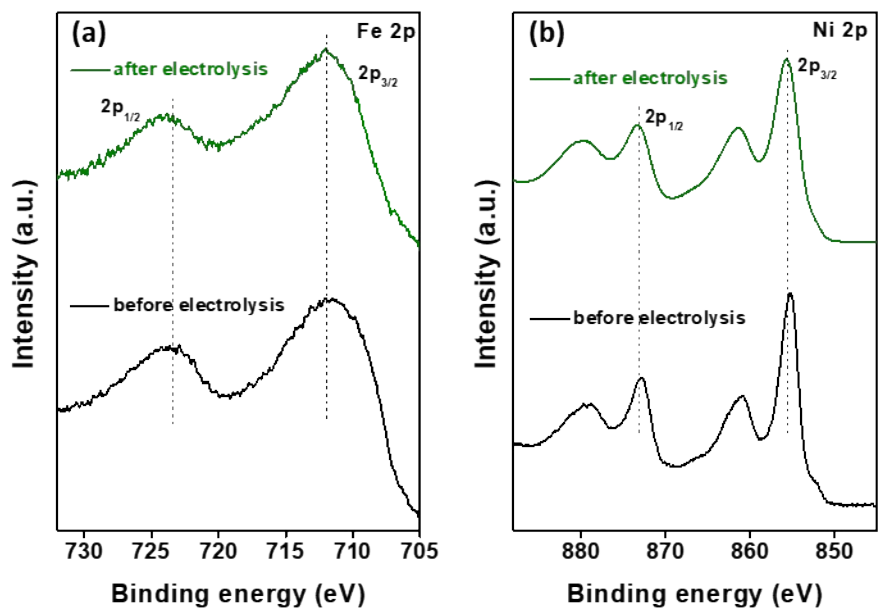

**Fig. S22B** XPS spectra for  $\text{Fe}_3\text{O}_4$ -70/NiB-CP electrodes (a) Fe 2p and (b) Ni 2p before and after electrolysis.

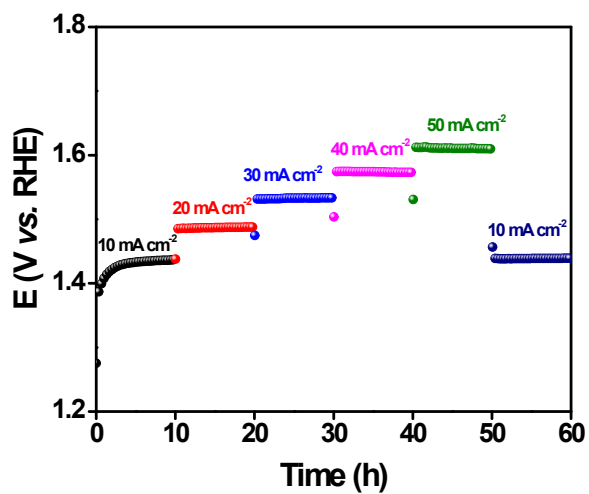

**Fig. S23** Sequential chronopotentiometric measurements at different current densities for  $\text{Fe}_3\text{O}_4$ -70/NiB-CP respectively

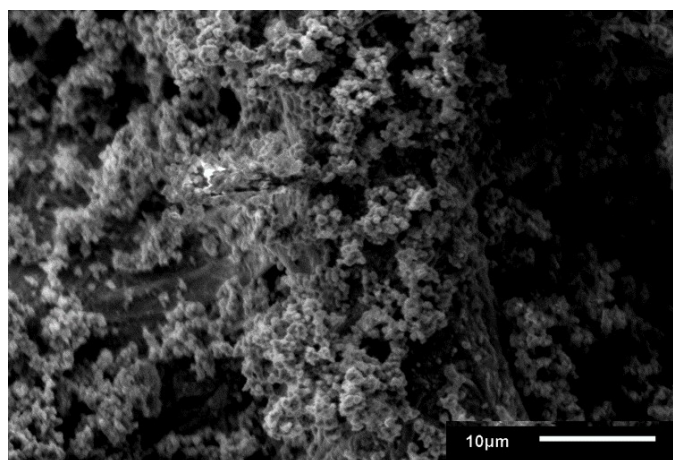

**Fig. S24 A** SEM image of Fe<sub>3</sub>O<sub>4</sub>-70/NiB-CP electrode after OER stability measurements.

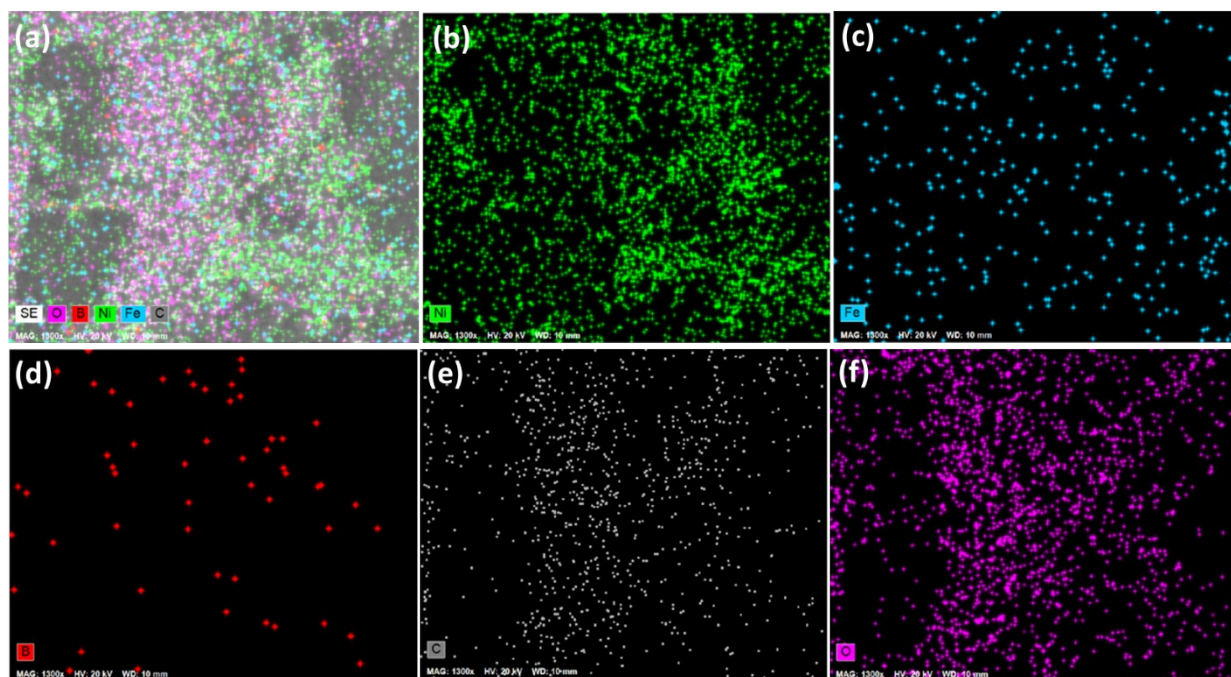

**Fig. S24 B** Elemental dot mapping image of  $\text{Fe}_3\text{O}_4$ -70/NiB-CP (a) for all elements and separately (b) Ni, (c) Fe (d) B (e) C and (f) oxygen after stability measurements.

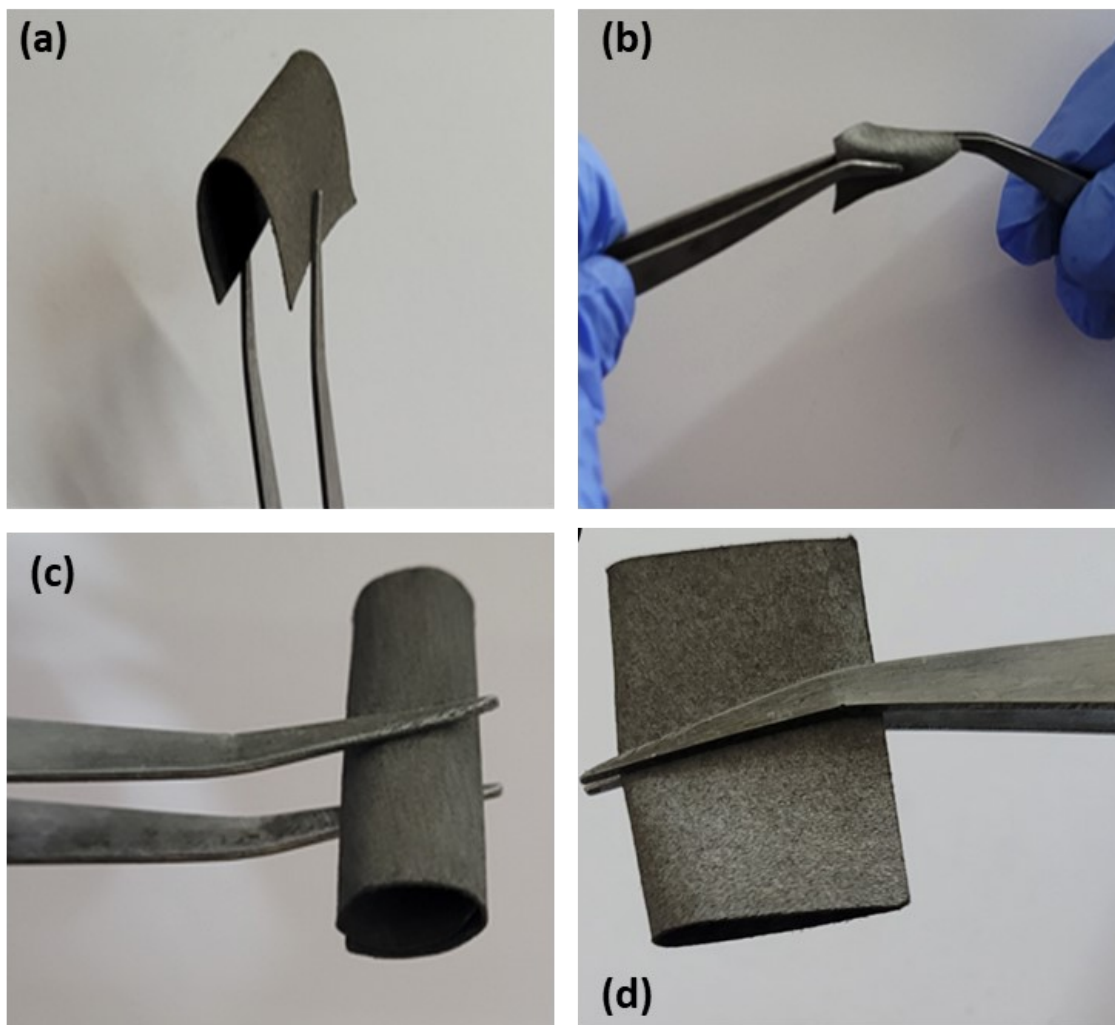

**Fig. S25** Photographs of  $\text{Fe}_3\text{O}_4$ -70/NiB-CP electrodes showing high flexibility during (a) bending, (b) twisting (c) rolling and (d) folding deformation states.

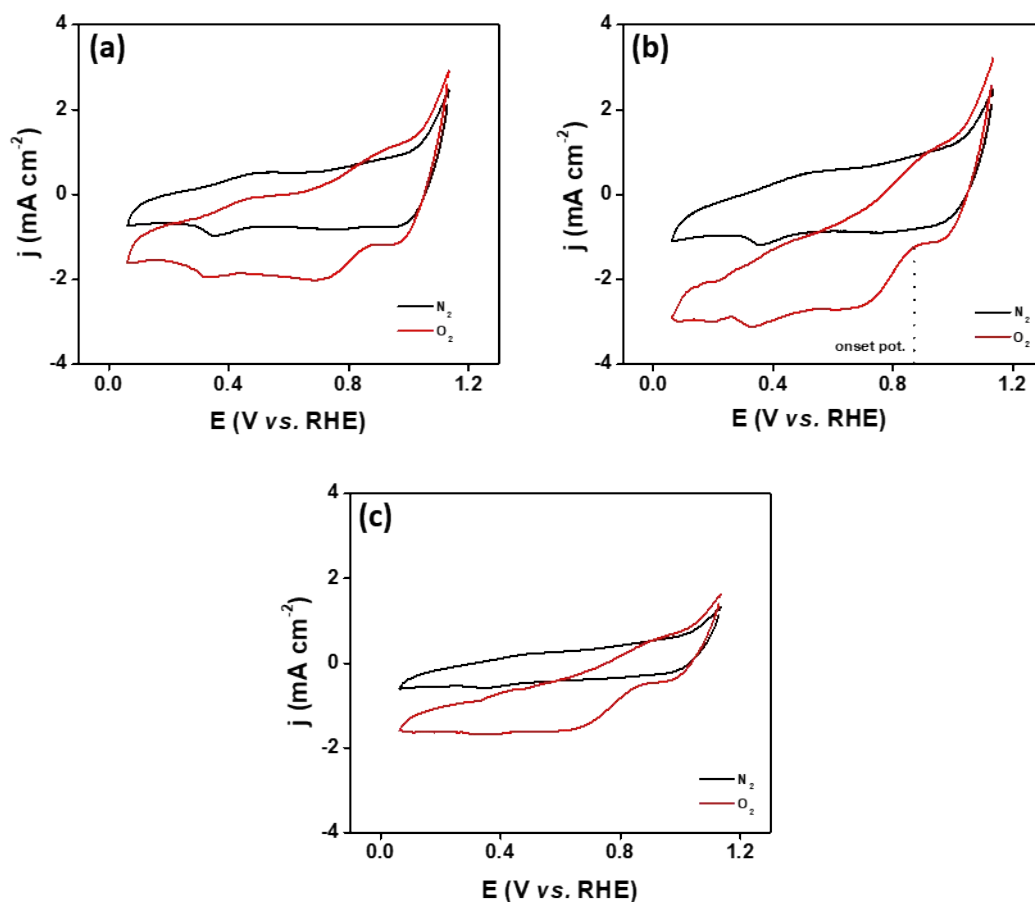

**Fig. S26A** Cyclic voltammogram of (a) Fe<sub>3</sub>O<sub>4</sub>-60/NiB-CP (b) Fe<sub>3</sub>O<sub>4</sub>-70/NiB-CP and (c) Fe<sub>3</sub>O<sub>4</sub>-80/NiB-CP electrodes in presence and absence of oxygen in 1 M KOH CE: Pt wire; RE: Hg/HgO/1M NaOH at a scan rate of at 25 mV s<sup>-1</sup>.

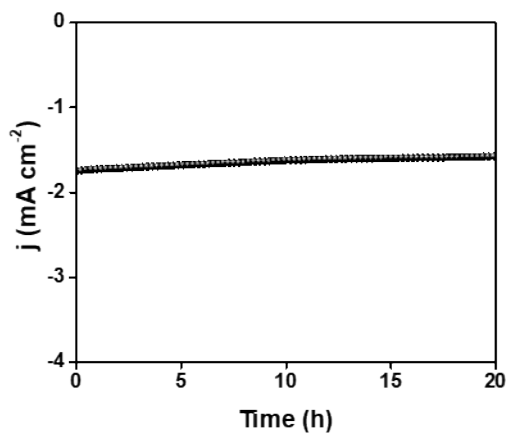

**Fig. S26B** Chronopotentiometric curve for Fe<sub>3</sub>O<sub>4</sub>-70/NiB-CP electrodes in oxygen saturated 1 M KOH.

**Table S8.** Comparison of onset potential for different composites.

| S.No. | Composites                                | Onset potential (V vs. RHE) |
|-------|-------------------------------------------|-----------------------------|
| 1     | Fe <sub>3</sub> O <sub>4</sub> -60/NiB-CP | 0.85                        |
| 2     | Fe <sub>3</sub> O <sub>4</sub> -70/NiB-CP | 0.87                        |
| 3     | Fe <sub>3</sub> O <sub>4</sub> -80/NiB-CP | 0.84                        |

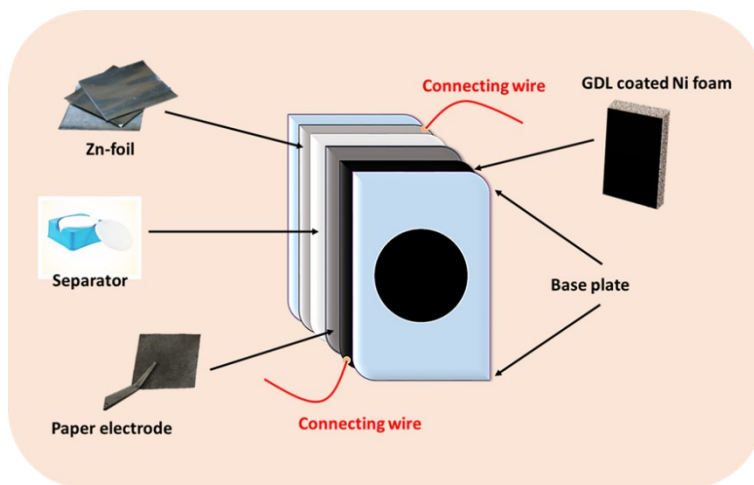

**Fig. S27** Schematic representation of assembly of home-made Zn-O<sub>2</sub> battery.

**Table S9.** Comparison of peak power density with respect to amount of catalyst loaded for flexible Zn-O<sub>2</sub> battery with other reported literatures.

| S.No. | Composite                                    | Substrate              | Peak power density (mW cm <sup>-2</sup> mg <sub>cat</sub> <sup>-1</sup> ) | References       |
|-------|----------------------------------------------|------------------------|---------------------------------------------------------------------------|------------------|
| 1     | CNT/Ag <sub>1</sub> /CNF                     | Cellulose Paper        | 70*                                                                       | 14               |
| 2     | Co@NCNTA-700                                 | Carbon cloth           | 38.6                                                                      | 15               |
| 3     | NC-Co SA                                     | Carbon cloth           | 22.96                                                                     | 16               |
| 4     | NC-Co <sub>3</sub> O <sub>4</sub>            | Carbon cloth           | 68.33 <sup>#</sup>                                                        | 17               |
| 5     | Silk NC/KB                                   | Carbon cloth           | 32.3                                                                      | 18               |
| 6     | CC-AC                                        | Carbon cloth           | 52.3 <sup>§</sup>                                                         | 19               |
| 7     | Co/N@CNTs@CNMF-800                           | CNT macrofilm          | 125.5                                                                     | 20               |
| 8     | Zn/Co-ZIFs/PAN                               | Carbon paper           | 69.6                                                                      | 21               |
| 9     | <b>Fe<sub>3</sub>O<sub>4</sub>-70/NiB-CP</b> | <b>Cellulose Paper</b> | <b>300</b>                                                                | <b>This work</b> |
| 10    | Pt/C + RuO <sub>2</sub> /NiB-CP              | Cellulose Paper        | 326                                                                       | This work        |

**CNT/Ag<sub>1</sub>/CNF**: Carbon nanotube/cellulose nanofiber composite paper loaded with silver nanoparticles, **Co@NCNTAs**: cobalt NPs embedded in N-doped carbon nanotube arrays on CC, **NC-Co<sub>3</sub>O<sub>4</sub>-90**: Co<sub>3</sub>O<sub>4</sub> nanospheres in nitrogen-doped carbon nanowall, **NC-Co SA**: nitrogen-doped porous carbon nanoflake arrays, **Silk NC/KB**: silk-derived defect-rich and nitrogen-doped nanocarbon, **CC-AC**: activated commercial carbon cloth, **Co/N@CNTs@CNMF-800**: cobalt nanoparticles embedded nitrogen-rich carbon nanotubes. \* mW cm<sup>-2</sup>, # mW cm<sup>-3</sup> mg<sub>cat</sub><sup>-1</sup>, § mW cm<sup>-3</sup>



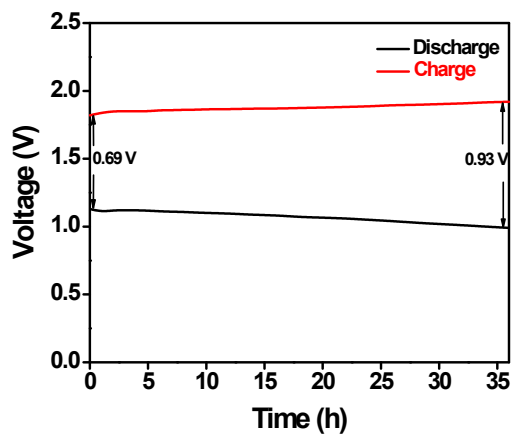

**Fig. S28A** Potential variation study with respect to time during prolonged charge-discharge cycles.

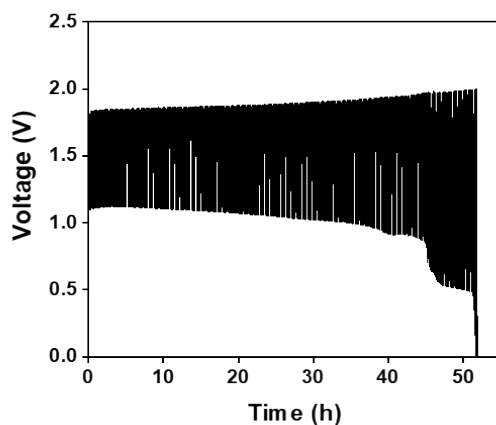

**Fig. S28B** Battery cycling performance at current density of  $5 \text{ mA cm}^{-2}$  till failure.

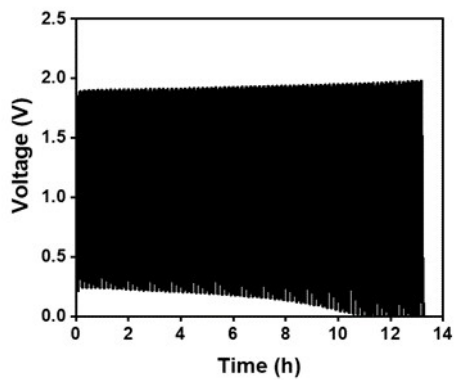

**Fig. S28C** Battery cycling performance at  $5 \text{ mA cm}^{-2}$  with used air cathode (after stability) and fresh anode, GDL, separator.

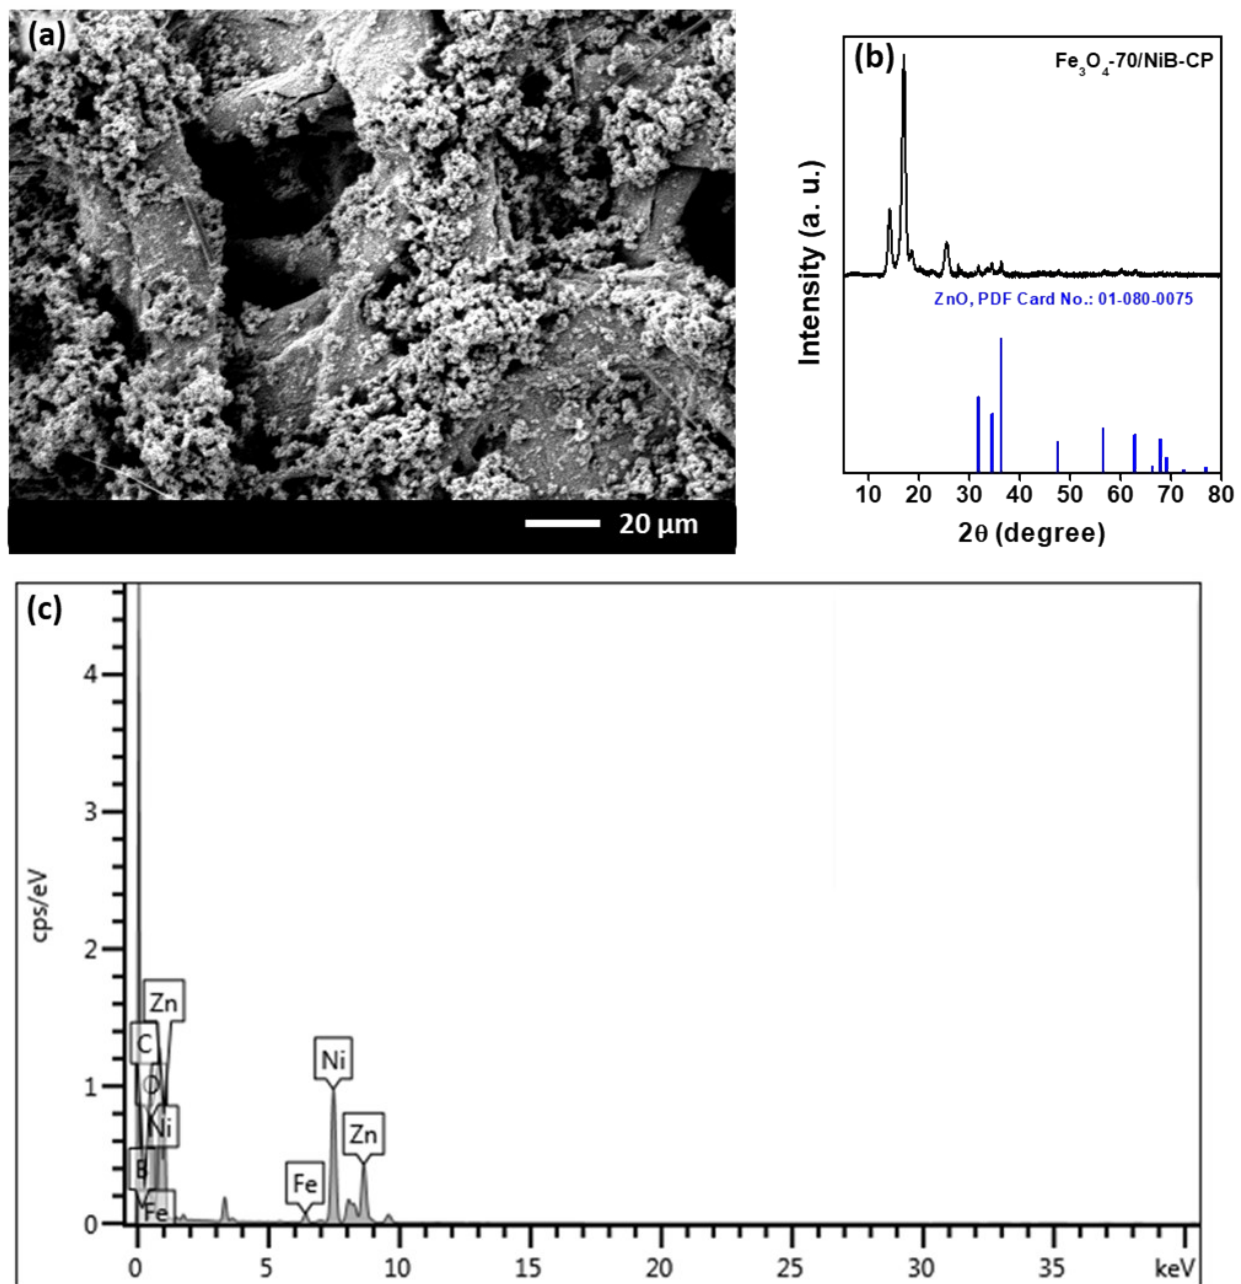

**Fig. S28D** (a) SEM image, (b) P-XRD pattern, (c) EDS spectrum for Fe<sub>3</sub>O<sub>4</sub>-70/NiB-CP air cathode collected after long-term battery cycling and subsequent failure.

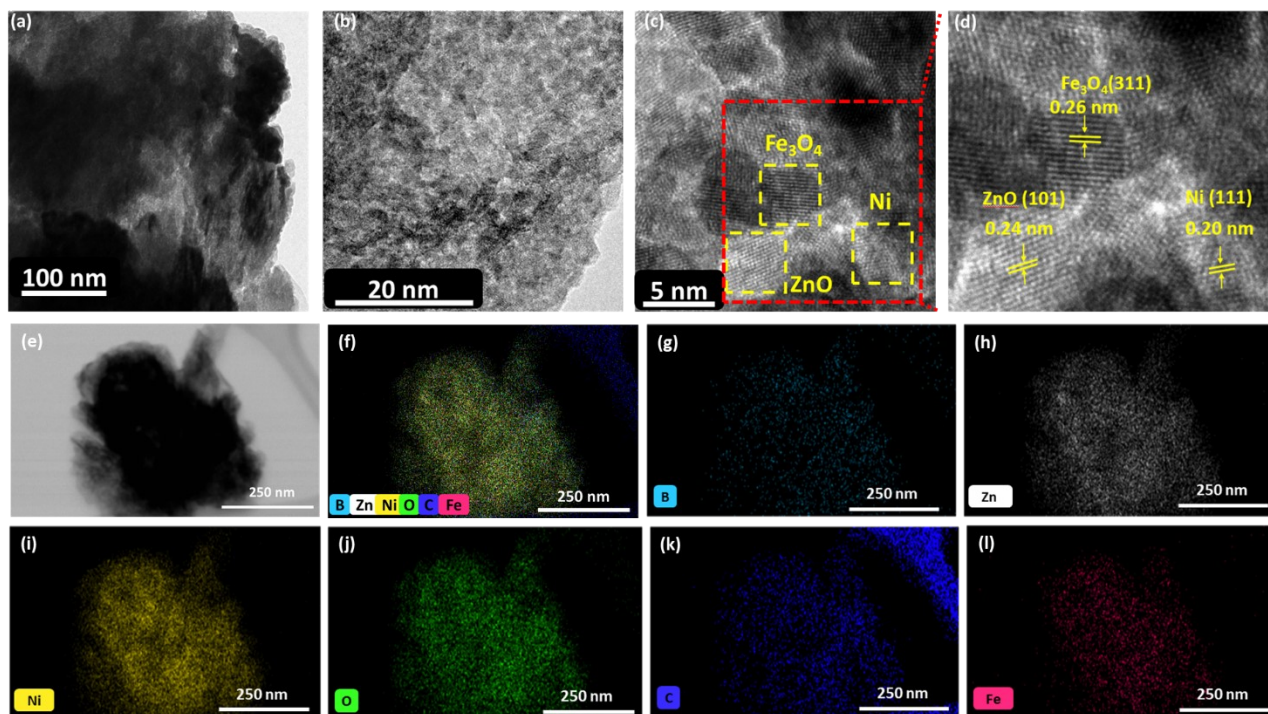

**Fig. S28E** (a) TEM image, (b-d) HR-TEM images with presence of lattice fringes related to  $\text{Fe}_3\text{O}_4$ , Ni and ZnO and (e-l) TEM EDS spectrum for  $\text{Fe}_3\text{O}_4$ -70/NiB-CP air cathode collected after long-term battery cycling and subsequent failure.

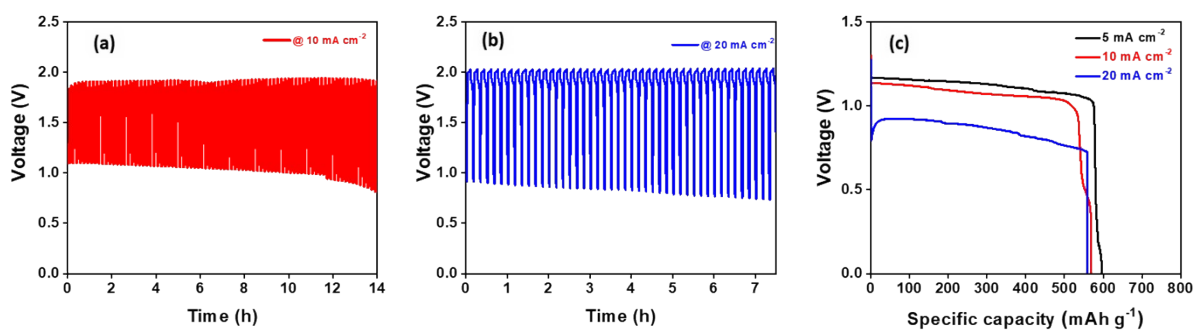

**Fig. S28F** (a) Long-term cycling stability of  $\text{Fe}_3\text{O}_4$ -70/NiB-CP equipped Zn-air battery at  $10 \text{ mA cm}^{-2}$  and (b)  $20 \text{ mA cm}^{-2}$  of current density respectively. (c) Comparison of rate performance of air cathode in terms of specific capacity at different current densities.

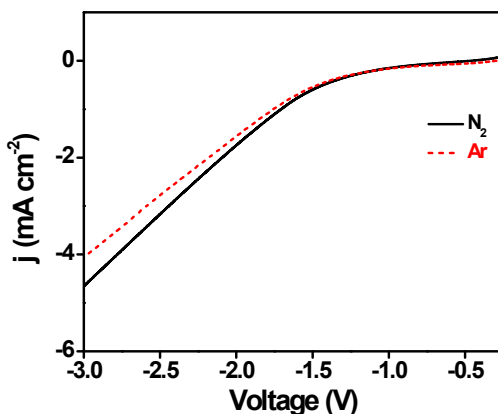

**Fig. S29** LSV curve acquired during full cell study of  $\text{Fe}_3\text{O}_4$ -70/NiB-CP//  $\text{Fe}_3\text{O}_4$ -70/NiB-CP

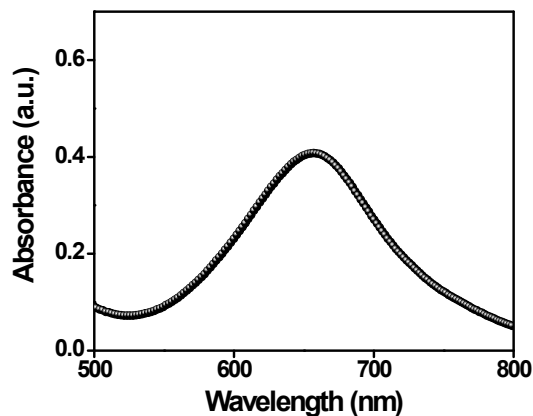

**Fig. S30** UV-vis spectrum recorded for quantification of ammonia formed when powered by Zn- $\text{O}_2$  battery.

## References

1. D. K. Schroder, *Semiconductor material and device characterization*, John Wiley & Sons, 2015.

2. W. Liu, C. Li, Q. Xu, P. Yan, C. Niu, Y. Shen, P. Yuan and Y. Jia, *ChemCatChem*, 2019, **11**, 5412-5416.
3. Y. Zhao, R. Shi, X. Bian, C. Zhou, Y. Zhao, S. Zhang, F. Wu, G. I. Waterhouse, L. Z. Wu and C. H. Tung, *Adv. Sci.*, 2019, **6**, 1802109.
4. W. Li, T. Wu, S. Zhang, Y. Liu, C. Zhao, G. Liu, G. Wang, H. Zhang and H. Zhao, *Chem. Commun.*, 2018, **54**, 11188-11191.
5. G. Liu, C. Zhao and S. Ding, *New J. Chem.*, 2020, **44**, 21070-21075.
6. S. Cheng, C. Li, Z. Yu, Y. Sun, L. Li and J. Yang, *RSC Adv.*, 2020, **10**, 9814-9823.
7. Z. Wang, K. Zheng, S. Liu, Z. Dai, Y. Xu, X. Li, H. Wang and L. Wang, *ACS Sustain. Chem. Eng.*, 2019, **7**, 11754-11759.
8. G. Li, Z. Pan, H. Lin and L. An, *J. Alloys Compd.*, 2021, **875**, 160006.
9. X. Chen, Y.-T. Liu, C. Ma, J. Yu and B. Ding, *J. Mater. Chem. A*, 2019, **7**, 22235-22241.
10. X. Zhao, X. Zhang, Z. Xue, W. Chen, Z. Zhou and T. Mu, *J. Mater. Chem. A*, 2019, **7**, 27417-27422.
11. X. Zhang, R.-M. Kong, H. Du, L. Xia and F. Qu, *Chem. Commun.*, 2018, **54**, 5323-5325.
12. J. Zhang, X. Tian, M. Liu, H. Guo, J. Zhou, Q. Fang, Z. Liu, Q. Wu and J. Lou, *J. Am. Chem. Soc.*, 2019, **141**, 19269-19275.
13. L. Li, C. Tang, D. Yao, Y. Zheng and S.-Z. Qiao, *ACS Energy Lett.*, 2019, **4**, 2111-2116.
14. S. Li, W. Zhao, N. Zhang, Y. Luo, Y. Tang, G. Du, C. Wang, X. Zhang and L. Li, *Energy Fuels*, 2021, **35**, 9017-9028.
15. L. Liu, Y. Wang, F. Yan, C. Zhu, B. Geng, Y. Chen and S. I. Chou, *Small Methods*, 2020, **4**, 1900571.
16. W. Zang, A. Sumboja, Y. Ma, H. Zhang, Y. Wu, S. Wu, H. Wu, Z. Liu, C. Guan and J. Wang, *ACS Catal.*, 2018, **8**, 8961-8969.
17. C. Guan, A. Sumboja, H. Wu, W. Ren, X. Liu, H. Zhang, Z. Liu, C. Cheng, S. J. Pennycook and J. Wang, *Adv. Mater.*, 2017, **29**, 1704117.
18. C. Wang, N.-H. Xie, Y. Zhang, Z. Huang, K. Xia, H. Wang, S. Guo, B.-Q. Xu and Y. Zhang, *Chem. Mater.*, 2019, **31**, 1023-1029.
19. K. Kordek, L. Jiang, K. Fan, Z. Zhu, L. Xu, M. Al-Mamun, Y. Dou, S. Chen, P. Liu and H. Yin, *Adv. Energy Mater.*, 2019, **9**, 1802936.
20. T. Liu, J. Mou, Z. Wu, C. Lv, J. Huang and M. Liu, *Adv. Funct. Mater.*, 2020, **30**, 2003407.
21. Q. Niu, B. Chen, J. Guo, J. Nie, X. Guo and G. Ma, *Nano-Micro Lett.*, 2019, **11**, 1-17.
